# Supplementary material for: Correlation of Dual Colour Single Particle Trajectories for Improved Detection and Analysis of Interactions in Living Cells
Source: MDPI journal article supplement (doi:10.3390/ijms140816485), 2013-08-08
Supplement: s1 [file s1]

## Supplementary Information

**Supplementary Movie 1.** An overlay of two movies of a living RPE cell recorded at 53 min after uptake of the polyplexes for 60 s with a speed of 2 frames per second and with an image acquisition time of 30 ms. The green movie corresponds to the fluorescent label of the flotillin-2 type endosomes and the red movie corresponds to the fluorescent label of the polyplexes. Note that the contrast of the red movie was adjusted to include the dimmer objects.

**Supplementary Movie 2.** A subregion in the overlay of two movies of a living RPE cell recorded at 100 min after uptake of the polyplexes for 60 s with a speed of 2 frames per second and with an image acquisition time of 30 ms. The green movie corresponds to the fluorescent label of the flotillin-2 type endosomes and the red movie corresponds to the fluorescent label of the polyplexes. A transient event is shown where the polyplex and endosome are at first exhibiting correlated motion during the first 40 s, after which the polyplex moves away from the endosome.

**Supplementary Movie 3.** An overlay of two movies of a mixture of beads diffusing in water recorded for 6 s with a speed of 35 frames per second and with an image acquisition time of 6 ms. The green movie corresponds to the fluorescent label of the yellow-green 0.1  $\mu\text{m}$  diameter beads and the red movie corresponds to the fluorescent label of the dark red 0.1  $\mu\text{m}$  diameter beads.

**Table S1.** The probability  $P$  to observe a statistically significant correlation in a window with length  $w$  in a pair of trajectories coming from interacting objects with relative localization error  $r$ . The values were obtained from simulations of completely correlated trajectories for different lengths  $w = 3, 4, \dots, 200$  and different relative localization errors  $r = 0.01, 0.02, \dots, 1.00$ .

**Table S2.** The correlation threshold  $\rho_{\min}$  is the minimum statistically significant correlation in a window with length  $w$  and local relative localization error  $r$  in a pair of trajectories coming from interacting objects. The values are obtained from the correlation coefficient distribution for simulated completely correlated trajectories for different lengths  $w = 3, 4, \dots, 200$  and different relative localization errors  $r = 0.01, 0.02, \dots, 1.00$ .
