# Supplementary material for: Correlation of Dual Colour Single Particle Trajectories for Improved Detection and Analysis of Interactions in Living Cells
Source: Int J Mol Sci. 2013 Aug 8;14(8):16485–514. doi: 10.3390/ijms140816485 (PMC3759922; doi:10.3390/ijms140816485)
Supplement: Supplementary File 1 — Supplementary (ZIP, 5344 KB) [file ijms-14-16485-s001.zip]

Archive with 6 entries (6 files):
- ijms-35835-Table S2.csv
- ijms-35835-supplementary information.pdf
- ijms-35835-Supplementary Movie 1.avi
- ijms-35835-Supplementary Movie 2.avi
- ijms-35835-Supplementary Movie 3.avi
- ijms-35835-Table S1.csv
