# Supplementary material for: Correlation of Dual Colour Single Particle Trajectories for Improved Detection and Analysis of Interactions in Living Cells
Source: Int J Mol Sci. 2013 Aug 8;14(8):16485–514. doi: 10.3390/ijms140816485 (PMC3759922; doi:10.3390/ijms140816485)
Supplement: Supplementary File 1 — Supplementary (ZIP, 5344 KB) [file ijms-14-16485-s001.zip › ijms-35835-Table S1.csv]

	3	4	5	6	7	8	9	10	11	12	13	14	15	16	17	18	19	20	21	22	23	24	25	26	27	28	29	30	31	32	33	34	35	36	37	38	39	40	41	42	43	44	45	46	47	48	49	50	51
0.01	0.97177	0.99992	1	1	1	1	1	1	1	1	1	1	1	1	1	1	1	1	1	1	1	1	1	1	1	1	1	1	1	1	1	1	1	1	1	1	1	1	1	1	1	1	1	1	1	1	1	1	1
0.02	0.90433	0.99872	1	1	1	1	1	1	1	1	1	1	1	1	1	1	1	1	1	1	1	1	1	1	1	1	1	1	1	1	1	1	1	1	1	1	1	1	1	1	1	1	1	1	1	1	1	1	1
0.03	0.82096	0.99532	0.9998	1	1	1	1	1	1	1	1	1	1	1	1	1	1	1	1	1	1	1	1	1	1	1	1	1	1	1	1	1	1	1	1	1	1	1	1	1	1	1	1	1	1	1	1	1	1
0.04	0.73582	0.9902	0.9995	1	1	1	1	1	1	1	1	1	1	1	1	1	1	1	1	1	1	1	1	1	1	1	1	1	1	1	1	1	1	1	1	1	1	1	1	1	1	1	1	1	1	1	1	1	1
0.05	0.65341	0.98112	0.99815	0.99982	1	1	1	1	1	1	1	1	1	1	1	1	1	1	1	1	1	1	1	1	1	1	1	1	1	1	1	1	1	1	1	1	1	1	1	1	1	1	1	1	1	1	1	1	1
0.06	0.59275	0.96876	0.997	0.99988	1	1	1	1	1	1	1	1	1	1	1	1	1	1	1	1	1	1	1	1	1	1	1	1	1	1	1	1	1	1	1	1	1	1	1	1	1	1	1	1	1	1	1	1	1
0.07	0.52504	0.95212	0.9945	0.99976	0.99993	1	1	1	1	1	1	1	1	1	1	1	1	1	1	1	1	1	1	1	1	1	1	1	1	1	1	1	1	1	1	1	1	1	1	1	1	1	1	1	1	1	1	1	1
0.08	0.48585	0.93524	0.9913	0.99868	0.99972	1	1	1	1	1	1	1	1	1	1	1	1	1	1	1	1	1	1	1	1	1	1	1	1	1	1	1	1	1	1	1	1	1	1	1	1	1	1	1	1	1	1	1	1
0.09	0.44127	0.9148	0.98705	0.99718	0.99972	1	1	1	1	1	1	1	1	1	1	1	1	1	1	1	1	1	1	1	1	1	1	1	1	1	1	1	1	1	1	1	1	1	1	1	1	1	1	1	1	1	1	1	1
0.1	0.40269	0.89572	0.9824	0.99706	0.9993	0.99992	1	0.9999	1	1	1	1	1	1	1	1	1	1	1	1	1	1	1	1	1	1	1	1	1	1	1	1	1	1	1	1	1	1	1	1	1	1	1	1	1	1	1	1	1
0.11	0.3735	0.86644	0.97405	0.99496	0.99923	0.99968	0.99991	1	1	1	1	1	1	1	1	1	1	1	1	1	1	1	1	1	1	1	1	1	1	1	1	1	1	1	1	1	1	1	1	1	1	1	1	1	1	1	1	1	1
0.12	0.34128	0.83832	0.96485	0.99364	0.99776	0.99984	0.99991	1	1	1	1	1	1	1	1	1	1	1	1	1	1	1	1	1	1	1	1	1	1	1	1	1	1	1	1	1	1	1	1	1	1	1	1	1	1	1	1	1	1
0.13	0.32271	0.8158	0.95775	0.98842	0.9979	0.99952	0.99982	1	1	1	1	1	1	1	1	1	1	1	1	1	1	1	1	1	1	1	1	1	1	1	1	1	1	1	1	1	1	1	1	1	1	1	1	1	1	1	1	1	1
0.14	0.29628	0.78856	0.9478	0.98686	0.99678	0.99896	1	0.9998	1	1	1	1	1	1	1	1	1	1	1	1	1	1	1	1	1	1	1	1	1	1	1	1	1	1	1	1	1	1	1	1	1	1	1	1	1	1	1	1	1
0.15	0.28269	0.75884	0.93195	0.98008	0.99426	0.99856	0.99964	1	1	1	1	1	1	1	1	1	1	1	1	1	1	1	1	1	1	1	1	1	1	1	1	1	1	1	1	1	1	1	1	1	1	1	1	1	1	1	1	1	1
0.16	0.26547	0.7282	0.92255	0.97684	0.99342	0.99776	0.99946	0.9998	0.99989	1	1	1	1	1	1	1	1	1	1	1	1	1	1	1	1	1	1	1	1	1	1	1	1	1	1	1	1	1	1	1	1	1	1	1	1	1	1	1	1
0.17	0.25107	0.7076	0.90535	0.97168	0.99048	0.99752	0.99919	0.9997	0.99989	1	1	1	1	1	1	1	1	1	1	1	1	1	1	1	1	1	1	1	1	1	1	1	1	1	1	1	1	1	1	1	1	1	1	1	1	1	1	1	1
0.18	0.23973	0.6706	0.89155	0.96436	0.98712	0.996	0.99892	0.9996	0.99989	1	1	1	1	1	1	1	1	1	1	1	1	1	1	1	1	1	1	1	1	1	1	1	1	1	1	1	1	1	1	1	1	1	1	1	1	1	1	1	1
0.19	0.22761	0.65132	0.87535	0.95506	0.9846	0.99488	0.99874	0.9995	0.99978	1	0.99987	1	1	1	1	1	1	1	1	1	1	1	1	1	1	1	1	1	1	1	1	1	1	1	1	1	1	1	1	1	1	1	1	1	1	1	1	1	1
0.2	0.21753	0.62848	0.85885	0.94792	0.98012	0.99304	0.99721	0.999	0.99989	1	1	1	1	1	1	1	1	1	1	1	1	1	1	1	1	1	1	1	1	1	1	1	1	1	1	1	1	1	1	1	1	1	1	1	1	1	1	1	1
0.21	0.20283	0.59828	0.84265	0.93838	0.97697	0.99088	0.99775	0.9989	0.99967	1	0.99987	0.99986	1	1	0.99983	1	1	1	1	1	1	1	1	1	1	1	1	1	1	1	1	1	1	1	1	1	1	1	1	1	1	1	1	1	1	1	1	1	1
0.22	0.19686	0.57352	0.82365	0.93112	0.96948	0.9892	0.99397	0.9979	0.99912	0.9994	0.99987	1	1	1	1	1	1	1	1	1	1	1	1	1	1	1	1	1	1	1	1	1	1	1	1	1	1	1	1	1	1	1	1	1	1	1	1	1	1
0.23	0.18831	0.56036	0.80515	0.91984	0.96724	0.9864	0.99442	0.9978	0.99923	0.99952	1	0.99986	1	1	1	1	1	1	1	1	1	1	1	1	1	1	1	1	1	1	1	1	1	1	1	1	1	1	1	1	1	1	1	1	1	1	1	1	1
0.24	0.18078	0.53776	0.78605	0.9085	0.96598	0.98296	0.99244	0.9962	0.99901	0.9994	0.99974	0.99986	1	1	1	1	1	1	1	1	1	1	1	1	1	1	1	1	1	1	1	1	1	1	1	1	1	1	1	1	1	1	1	1	1	1	1	1	1
0.25	0.17631	0.50988	0.76385	0.89212	0.95723	0.98112	0.99028	0.9954	0.99868	0.99952	0.99974	1	0.99985	1	1	1	1	1	1	1	1	1	1	1	1	1	1	1	1	1	1	1	1	1	1	1	1	1	1	1	1	1	1	1	1	1	1	1	1
0.26	0.16749	0.4974	0.74705	0.88342	0.94372	0.97608	0.98992	0.9953	0.99824	0.99904	0.99948	1	1	0.99984	1	1	1	1	1	1	1	1	1	1	1	1	1	1	1	1	1	1	1	1	1	1	1	1	1	1	1	1	1	1	1	1	1	1	1
0.27	0.16083	0.47288	0.7284	0.86824	0.93987	0.9696	0.98902	0.994	0.99791	0.99928	0.99961	1	0.99985	1	1	1	1	1	1	1	1	1	1	1	1	1	1	1	1	1	1	1	1	1	1	1	1	1	1	1	1	1	1	1	1	1	1	1	1
0.28	0.15252	0.45224	0.70945	0.8545	0.93308	0.96624	0.98497	0.9937	0.99659	0.99796	0.99935	0.99972	0.99985	0.99968	0.99983	1	1	1	1	1	1	1	1	1	1	1	1	1	1	1	1	1	1	1	1	1	1	1	1	1	1	1	1	1	1	1	1	1	1
0.29	0.14841	0.43408	0.68815	0.84712	0.92055	0.96064	0.98128	0.9921	0.99626	0.99736	0.99922	0.99972	0.99985	1	1	1	1	1	1	1	1	1	1	1	1	1	1	1	1	1	1	1	1	1	1	1	1	1	1	1	1	1	1	1	1	1	1	1	1
0.3	0.14268	0.42184	0.6737	0.8284	0.91068	0.95232	0.97786	0.9908	0.99384	0.99736	0.9987	0.9993	0.99985	0.99984	1	1	1	1	1	1	1	1	1	1	1	1	1	1	1	1	1	1	1	1	1	1	1	1	1	1	1	1	1	1	1	1	1	1	1
0.31	0.14046	0.40148	0.66135	0.81496	0.90487	0.946	0.97534	0.9866	0.99428	0.99676	0.99909	0.99944	0.9997	0.99968	1	1	0.99981	1	1	1	1	1	1	1	1	1	1	1	1	1	1	1	1	1	1	1	1	1	1	1	1	1	1	1	1	1	1	1	1
0.32	0.13392	0.39336	0.64435	0.7942	0.8936	0.94224	0.9694	0.9851	0.99384	0.99556	0.99818	0.99916	0.99955	0.99968	1	0.99982	1	1	1	1	1	1	1	1	1	1	1	1	1	1	1	1	1	1	1	1	1	1	1	1	1	1	1	1	1	1	1	1	1
0.33	0.13077	0.37556	0.61955	0.79048	0.88527	0.93832	0.96607	0.9825	0.9912	0.99424	0.99701	0.9986	0.99985	0.99936	1	1	0.99981	1	1	1	1	1	1	1	1	1	1	1	1	1	1	1	1	1	1	1	1	1	1	1	1	1	1	1	1	1	1	1	1
0.34	0.12693	0.36788	0.60255	0.76864	0.86875	0.92576	0.96319	0.9767	0.98944	0.9928	0.99662	0.9986	0.9991	0.9992	1	1	1	0.9998	1	1	1	1	1	1	1	1	1	1	1	1	1	1	1	1	1	1	1	1	1	1	1	1	1	1	1	1	1	1	1
0.35	0.12357	0.34872	0.58945	0.75262	0.85923	0.92344	0.95752	0.9759	0.98724	0.99292	0.99558	0.99776	0.99895	0.99904	1	1	1	1	0.99958	1	1	1	1	1	1	1	1	1	1	1	1	1	1	1	1	1	1	1	1	1	1	1	1	1	1	1	1	1	1
0.36	0.11793	0.33744	0.5727	0.74963	0.8481	0.91376	0.95365	0.973	0.98504	0.991	0.9961	0.99804	0.99925	0.99904	0.99932	0.99982	0.99981	0.9996	1	1	1	1	1	1	1	1	1	1	1	1	1	1	1	1	1	1	1	1	1	1	1	1	1	1	1	1	1	1	1
0.37	0.11535	0.32432	0.5573	0.72575	0.83256	0.9032	0.94537	0.9673	0.98449	0.99076	0.99519	0.99734	0.9988	0.99872	0.99983	0.99964	1	0.9998	1	1	1	1	1	1	1	1	1	1	1	1	1	1	1	1	1	1	1	1	1	1	1	1	1	1	1	1	1	1	1
0.38	0.11358	0.31352	0.55115	0.71915	0.82136	0.89768	0.94168	0.9628	0.98042	0.9868	0.99311	0.99706	0.9988	0.9984	0.99949	0.99964	1	0.9998	0.99979	1	1	1	1	1	1	1	1	1	1	1	1	1	1	1	1	1	1	1	1	1	1	1	1	1	1	1	1	1	1
0.39	0.10968	0.30824	0.5275	0.69095	0.81359	0.88896	0.92836	0.9595	0.97701	0.98848	0.99155	0.9965	0.99655	0.99904	0.99932	0.99982	0.99962	1	0.99979	1	1	1	1	1	1	1	1	1	1	1	1	1	1	1	1	1	1	1	1	1	1	1	1	1	1	1	1	1	1
0.4	0.10806	0.28844	0.5111	0.68447	0.79847	0.8736	0.92458	0.9544	0.97371	0.98344	0.99181	0.99468	0.9958	0.9984	0.99847	0.9991	0.99943	1	1	0.99978	0.99977	1	1	1	1	1	1	1	1	1	1	1	1	1	1	1	1	1	1	1	1	1	1	1	1	1	1	1	1
0.41	0.10245	0.28156	0.50485	0.67223	0.79112	0.8692	0.92062	0.948	0.96964	0.98344	0.99025	0.99552	0.99655	0.99872	0.99932	0.99964	0.99981	1	0.99979	0.99956	1	1	1	1	1	1	1	1	1	1	1	1	1	1	1	1	1	1	1	1	1	1	1	1	1	1	1	1	1
0.42	0.10578	0.2764	0.48995	0.65993	0.77929	0.86112	0.9091	0.942	0.96304	0.98044	0.98921	0.99356	0.99565	0.99664	0.99847	0.99892	0.99943	1	1	0.99978	1	1	1	1	1	1	1	1	1	1	1	1	1	1	1	1	1	1	1	1	1	1	1	1	1	1	1	1	1
0.43	0.10101	0.26296	0.4697	0.64565	0.75206	0.85072	0.9019	0.9434	0.95963	0.9748	0.98765	0.993	0.99475	0.99632	0.99932	0.99856	0.99943	0.9998	0.99979	1	1	1	1	1	1	1	1	1	1	1	1	1	1	1	1	1	1	1	1	1	1	1	1	1	1	1	1	1	1
0.44	0.097951	0.25468	0.4563	0.63227	0.75843	0.8424	0.89992	0.9342	0.96227	0.9754	0.9857	0.98866	0.99235	0.99728	0.99796	0.9991	0.99924	0.9994	0.99979	0.99978	0.99977	1	1	1	1	1	1	1	1	1	1	1	1	1	1	1	1	1	1	1	1	1	1	1	1	1	1	1	1
0.45	0.094801	0.24584	0.4423	0.61469	0.73527	0.83024	0.88921	0.9262	0.95402	0.97108	0.98024	0.98978	0.99355	0.99488	0.99711	0.99838	0.99943	0.9994	0.99979	1	1	1	1	1	1	1	1	1	1	1	1	1	1	1	1	1	1	1	1	1	1	1	1	1	1	1	1	1	1
0.46	0.095281	0.24108	0.4315	0.59747	0.72575	0.81888	0.87733	0.9211	0.95325	0.96796	0.98245	0.98656	0.99205	0.99504	0.99643	0.99784	0.99848	0.999	0.99979	1	1	1	0.99975	1	1	1	1	1	1	1	1	1	1	1	1	1	1	1	1	1	1	1	1	1	1	1	1	1	1
0.47	0.088171	0.23116	0.4251	0.58025	0.71273	0.80864	0.87382	0.9152	0.94665	0.96604	0.97933	0.98544	0.9916	0.99488	0.99694	0.99838	0.99886	0.999	0.99916	0.99934	1	1	1	1	1	1	1	1	1	1	1	1	1	1	1	1	1	1	1	1	1	1	1	1	1	1	1	1	1
0.48	0.091711	0.22972	0.41015	0.57497	0.70433	0.79504	0.86536	0.9126	0.9395	0.96052	0.97699	0.98628	0.98965	0.99312	0.99541	0.99838	0.99734	0.9984	0.99979	0.9989	0.99977	1	0.99975	1	0.99973	1	1	1	1	1	1	1	1	1	1	1	1	1	1	1	1	1	1	1	1	1	1	1	1
0.49	0.087451	0.21868	0.40215	0.55739	0.69089	0.78744	0.85114	0.9008	0.93246	0.9586	0.97101	0.98348	0.9892	0.99216	0.99575	0.99784	0.99924	0.9984	0.99916	0.99934	1	1	1	1	1	1	1	1	1	1	1	1	1	1	1	1	1	1	1	1	1	1	1	1	1	1	1	1	1
0.5	0.087091	0.21348	0.3869	0.54821	0.6771	0.77272	0.84475	0.9005	0.93246	0.955	0.96828	0.98096	0.988	0.99168	0.99337	0.99748	0.99772	0.9982	0.99916	0.99934	0.99954	1	0.9995	0.99974	1	1	1	1	1	1	1	1	1	1	1	1	1	1	1	1	1	1	1	1	1	1	1	1	1
0.51	0.085351	0.21152	0.37845	0.53867	0.66254	0.768	0.83458	0.8938	0.92597	0.94792	0.96191	0.9769	0.98485	0.9888	0.99456	0.9955	0.99734	0.9982	0.99811	0.9989	0.99977	0.99952	1	1	1	1	1	1	1	1	1	1	1	1	1	1	1	1	1	1	1	1	1	1	1	1	1	1	1
0.52	0.081451	0.199	0.3691	0.52967	0.65715	0.75056	0.8281	0.8783	0.91849	0.94108	0.9636	0.97718	0.98185	0.99136	0.99269	0.99514	0.99715	0.998	0.99895	0.9989	0.99931	1	1	0.99974	1	0.99972	1	1	1	1	1	1	1	1	1	1	1	1	1	1	1	1	1	1	1	1	1	1	1
0.53	0.081091	0.19696	0.3588	0.51911	0.64525	0.74448	0.81649	0.8697	0.91178	0.94276	0.95931	0.97382	0.9805	0.9864	0.99201	0.99406	0.9981	0.9986	0.99832	0.99868	0.99908	0.99976	1	0.99974	1	0.99972	1	1	1	1	1	1	1	1	1	1	1	1	1	1	1	1	1	1	1	1	1	1	1
0.54	0.081031	0.19028	0.34435	0.50303	0.6372	0.73632	0.80281	0.8689	0.90276	0.93184	0.95931	0.97102	0.98035	0.98688	0.99167	0.99406	0.99525	0.9976	0.99874	0.99868	0.99954	0.99952	1	1	1	1	1	1	1	1	1	1	1	1	1	1	1	1	1	1	1	1	1	1	1	1	1	1	1
0.55	0.080191	0.1822	0.33875	0.49367	0.61711	0.72528	0.79687	0.8602	0.8999	0.93352	0.95242	0.96584	0.9787	0.98368	0.98946	0.99298	0.99411	0.9956	0.9979	0.99846	0.99908	0.99808	1	0.99974	1	0.99972	1	1	1	1	1	1	1	1	1	1	1	1	1	1	1	1	1	1	1	1	1	1	1
0.56	0.078931	0.18124	0.3342	0.47621	0.61753	0.7116	0.78895	0.8478	0.89055	0.92608	0.94384	0.96262	0.97255	0.98416	0.98742	0.99154	0.99259	0.9968	0.99748	0.99758	0.99862	0.99928	0.99925	0.99974	0.99973	1	1	1	1	1	1	1	1	1	1	1	1	1	1	1	1	1	1	1	1	1	1	1	1
0.57	0.075181	0.178	0.327	0.45785	0.59492	0.69488	0.77788	0.8426	0.8856	0.92056	0.94371	0.95758	0.97525	0.9824	0.9864	0.9919	0.99506	0.9956	0.99601	0.99824	0.99839	0.99904	1	0.99922	0.99973	1	1	0.9997	1	1	1	1	0.99965	1	1	1	1	1	1	1	1	1	1	1	1	1	1	1	1
0.58	0.075481	0.17148	0.31165	0.45629	0.58253	0.69496	0.77203	0.831	0.87482	0.91096	0.94345	0.95982	0.96835	0.98032	0.98606	0.991	0.99506	0.995	0.9979	0.99714	0.99816	0.99928	0.99875	0.99922	0.99946	1	1	1	1	1	0.99967	0.99966	1	1	1	1	1	1	1	1	1	1	1	1	1	1	1	1	1
0.59	0.071371	0.1698	0.30115	0.44081	0.57973	0.68568	0.7624	0.8341	0.87251	0.90724	0.93877	0.95688	0.96925	0.97808	0.98572	0.98866	0.99297	0.9936	0.99517	0.99714	0.99908	0.99856	0.99925	0.99948	0.99892	0.99972	0.99942	1	1	0.99968	1	1	1	1	1	1	1	1	1	1	1	1	1	1	1	1	1	1	1
0.6	0.073651	0.1694	0.29365	0.43709	0.55824	0.67528	0.75331	0.8181	0.86063	0.8986	0.93097	0.94736	0.96565	0.97216	0.98045	0.991	0.99031	0.994	0.99559	0.99714	0.9977	0.99952	1	0.99974	0.99973	0.99972	0.99971	0.9997	0.99969	1	1	1	1	1	1	1	1	1	1	1	1	1	1	1	1	1	1	1	1
0.61	0.072121	0.159	0.29285	0.42761	0.55789	0.65744	0.74629	0.8043	0.85843	0.89692	0.92525	0.9461	0.9595	0.97232	0.97671	0.98776	0.99031	0.9924	0.99433	0.99582	0.99747	0.99832	0.99925	0.99974	0.99946	0.99916	0.99942	0.9997	0.99938	1	1	1	1	1	1	1	1	1	1	1	1	1	1	1	1	1	1	1	1
0.62	0.070021	0.15668	0.2836	0.42209	0.53969	0.64808	0.73531	0.8008	0.84809	0.88936	0.9194	0.9384	0.9595	0.9704	0.9796	0.98308	0.98841	0.993	0.99517	0.99428	0.99747	0.9988	0.99875	0.99948	0.99973	0.99972	0.99971	1	1	0.99968	1	1	1	1	0.99963	1	1	1	1	1	1	1	1	1	1	1	1	1	1
0.63	0.070741	0.15248	0.27295	0.41093	0.52387	0.63376	0.71938	0.7865	0.83533	0.88768	0.9142	0.9398	0.9538	0.97216	0.97739	0.98524	0.98765	0.9932	0.99517	0.99362	0.99747	0.9976	0.99825	0.99844	0.99892	0.99972	0.99971	1	1	1	1	1	1	1	1	1	1	1	1	1	1	1	1	1	1	1	1	1	1
0.64	0.067921	0.14752	0.2671	0.39695	0.52009	0.63672	0.70363	0.7874	0.83368	0.87928	0.9077	0.93378	0.9514	0.96272	0.9762	0.98344	0.98556	0.991	0.99412	0.99516	0.99655	0.9988	0.99925	0.99896	0.99919	0.99944	0.99971	0.9997	0.99938	1	0.99967	1	1	1	1	1	1	1	1	1	1	1	1	1	1	1	1	1	1
0.65	0.065191	0.1452	0.26085	0.39131	0.51085	0.62296	0.69841	0.7813	0.82466	0.86979	0.90536	0.93182	0.94405	0.96336	0.97229	0.98038	0.98556	0.9898	0.99286	0.9956	0.99517	0.99736	0.9985	0.9987	0.99973	0.99944	0.99855	1	0.99969	0.99904	0.99967	1	1	1	1	0.99962	1	1	1	1	1	1	1	1	1	1	1	1	1
0.66	0.068161	0.14404	0.2517	0.37517	0.49881	0.60976	0.68959	0.7638	0.82158	0.86583	0.89691	0.93028	0.9481	0.95984	0.96753	0.97822	0.98442	0.9884	0.9916	0.99406	0.9954	0.99592	0.99725	0.99896	0.99865	0.9986	0.99942	1	0.99969	0.99904	1	0.99966	1	1	1	1	1	1	1	1	1	1	1	1	1	1	1	1	1
0.67	0.067801	0.14088	0.24675	0.37391	0.49251	0.59904	0.68455	0.7562	0.8119	0.85935	0.89561	0.91936	0.9406	0.95664	0.96549	0.9757	0.98271	0.9872	0.99286	0.99516	0.99563	0.99688	0.9975	0.99948	0.99919	0.99916	0.99913	0.9985	0.99969	0.99968	0.99901	1	1	0.99964	1	1	1	1	1	1	1	1	1	1	1	1	1	1	1
0.68	0.060271	0.13476	0.23935	0.37313	0.48453	0.58848	0.67294	0.7546	0.80189	0.86235	0.88222	0.91852	0.93235	0.95232	0.96481	0.97732	0.98271	0.987	0.99076	0.99054	0.99379	0.99688	0.99575	0.99766	0.99946	0.99776	0.99942	0.9997	0.99969	0.99904	0.99967	0.99966	1	1	0.99963	1	1	1	1	1	1	1	1	1	1	1	1	1	1
0.69	0.062011	0.13132	0.24005	0.36887	0.47529	0.57688	0.66754	0.7343	0.79738	0.84315	0.88911	0.91726	0.9358	0.95264	0.9609	0.96598	0.98157	0.985	0.98656	0.99164	0.99218	0.9964	0.9965	0.99636	0.99865	0.9972	0.99913	0.9985	0.99845	0.99968	0.99934	0.99966	1	1	1	1	1	1	1	1	1	1	1	1	1	1	1	1	1
0.7	0.060361	0.1292	0.2312	0.35399	0.46276	0.57248	0.66205	0.7338	0.78924	0.84399	0.87077	0.90662	0.92965	0.94448	0.95818	0.9649	0.98005	0.9814	0.9853	0.98812	0.99195	0.99712	0.9965	0.9974	0.99838	0.99804	0.99913	0.9994	0.99938	1	0.99967	1	1	1	0.99963	1	1	1	1	1	1	1	1	1	1	1	1	1	1
0.71	0.062461	0.12456	0.22265	0.33863	0.45982	0.55424	0.64279	0.7236	0.78066	0.83703	0.87428	0.90382	0.92275	0.94416	0.95903	0.9685	0.97587	0.9814	0.98908	0.98878	0.99241	0.99232	0.99725	0.99584	0.99784	0.9986	0.99884	0.9994	0.99938	1	1	0.99932	1	1	0.99963	0.99962	1	1	1	1	1	1	1	1	1	1	1	1	1
0.72	0.060511	0.1214	0.2228	0.34109	0.44449	0.54672	0.6382	0.7166	0.77065	0.82503	0.85803	0.89374	0.919	0.93584	0.95393	0.96598	0.97492	0.9798	0.98236	0.98636	0.98965	0.99424	0.9965	0.99688	0.99865	0.99804	0.99855	0.9994	0.99907	0.99936	1	0.99966	0.99965	1	1	1	1	1	0.99959	1	1	1	1	1	1	1	1	1	1
0.73	0.060091	0.12164	0.2193	0.32531	0.43812	0.54432	0.62857	0.7118	0.75921	0.81507	0.85569	0.89122	0.9124	0.9384	0.94781	0.96148	0.97207	0.98	0.98236	0.98768	0.99241	0.99448	0.99525	0.99558	0.99703	0.9986	0.99884	0.9982	0.99938	0.99968	0.99934	1	1	0.99964	1	1	1	1	1	1	1	1	1	1	1	1	1	1	1
0.74	0.060421	0.11972	0.2074	0.32351	0.43056	0.53392	0.61624	0.6905	0.75283	0.80775	0.86076	0.88464	0.90325	0.93136	0.94747	0.96418	0.97112	0.976	0.98278	0.98658	0.98988	0.99112	0.99425	0.9974	0.99676	0.99832	0.9971	0.9988	0.99876	0.99904	0.99934	1	0.99965	0.99964	0.99963	1	1	1	1	0.99958	1	1	1	1	1	1	1	1	1
0.75	0.057751	0.11636	0.2054	0.31121	0.42265	0.52368	0.60877	0.6785	0.75624	0.79911	0.84399	0.88016	0.9034	0.92704	0.94101	0.95284	0.9677	0.9706	0.98131	0.98614	0.98988	0.99088	0.99525	0.99662	0.99703	0.9986	0.99739	0.9979	0.99845	1	1	0.99966	0.99895	1	0.99963	1	1	1	1	0.99958	1	1	1	1	1	1	1	1	1
0.76	0.054931	0.11496	0.203	0.30923	0.41439	0.51224	0.61066	0.673	0.7404	0.79011	0.84126	0.8761	0.9064	0.92512	0.9405	0.95392	0.96105	0.9704	0.97417	0.98218	0.98873	0.9904	0.99225	0.9948	0.99622	0.99496	0.99768	0.9988	0.99783	0.99872	0.99967	0.99932	1	1	1	0.99924	1	1	1	1	1	1	1	1	1	1	1	1	1
0.77	0.059251	0.11	0.19845	0.30143	0.41362	0.5128	0.59689	0.6654	0.74194	0.79227	0.83281	0.87358	0.90325	0.91936	0.93659	0.95374	0.96162	0.9722	0.97795	0.9835	0.9885	0.99088	0.99425	0.9948	0.99568	0.9986	0.9971	0.9979	0.99907	0.99872	0.99934	0.99932	0.99965	0.99964	1	1	1	1	1	1	1	1	1	1	1	1	1	1	1
0.78	0.058501	0.11044	0.19705	0.29645	0.39374	0.49816	0.58033	0.66	0.72533	0.78531	0.8215	0.85804	0.89501	0.91888	0.92928	0.94888	0.96257	0.971	0.97123	0.98438	0.98413	0.98776	0.99275	0.9922	0.99649	0.99664	0.99681	0.9973	0.99876	0.9984	0.99901	0.99932	0.99965	0.99964	0.99926	1	0.99961	1	1	1	1	1	1	1	1	1	1	1	1
0.79	0.055231	0.10836	0.18745	0.29081	0.38548	0.48368	0.57727	0.6499	0.71235	0.77319	0.8137	0.85384	0.88811	0.91312	0.92775	0.94924	0.96124	0.9672	0.97144	0.98086	0.98367	0.98416	0.99275	0.99298	0.99541	0.9972	0.99739	0.9958	0.99752	0.9984	0.99868	1	1	0.99856	1	0.99962	0.99961	1	1	1	1	1	1	1	1	1	1	1	1
0.8	0.053491	0.10572	0.1847	0.28217	0.38835	0.47632	0.56674	0.6442	0.7184	0.76875	0.8163	0.84194	0.88526	0.9008	0.92588	0.93934	0.9563	0.9662	0.96808	0.97866	0.98367	0.98584	0.9905	0.99506	0.99433	0.99692	0.99536	0.9973	0.99752	0.99808	0.99901	0.99932	0.99965	0.99964	0.99889	1	1	1	1	1	0.99957	1	1	1	1	1	1	1	1
0.81	0.058471	0.10588	0.1812	0.27749	0.37491	0.47416	0.54892	0.627	0.71477	0.75795	0.79966	0.8509	0.88001	0.8968	0.92333	0.9397	0.94908	0.9618	0.96535	0.9813	0.98298	0.98704	0.99075	0.99272	0.9946	0.9958	0.99739	0.9988	0.99814	0.99776	0.99901	0.99932	0.99895	0.99928	0.99963	0.99848	0.99961	1	0.99959	1	0.99957	1	1	1	1	1	1	1	1
0.82	0.055951	0.1022	0.1828	0.27227	0.36693	0.46344	0.55306	0.6321	0.70025	0.74163	0.79589	0.84194	0.86816	0.89008	0.91908	0.93503	0.95212	0.9586	0.96976	0.97976	0.98321	0.98344	0.9885	0.99376	0.99325	0.99552	0.99565	0.9961	0.99783	0.99776	0.99901	0.99762	0.99895	0.99892	0.99926	0.99962	0.99961	1	0.99959	1	1	1	1	1	0.99953	1	1	1	1
0.83	0.051631	0.10076	0.1688	0.27179	0.37029	0.46064	0.54109	0.6284	0.69585	0.74895	0.79485	0.83312	0.86666	0.88768	0.91244	0.93053	0.94414	0.957	0.96682	0.97228	0.98413	0.98392	0.98475	0.98752	0.99433	0.99384	0.9942	0.9964	0.99721	0.99872	0.99835	0.9983	1	0.99928	1	0.99962	0.99922	0.9996	1	1	1	1	1	0.99954	1	1	1	1	1
0.84	0.053761	0.09848	0.17165	0.25739	0.36021	0.4508	0.53173	0.6137	0.68925	0.73539	0.79498	0.82836	0.85511	0.89408	0.91159	0.92855	0.94205	0.9506	0.96283	0.97646	0.97976	0.97936	0.988	0.98804	0.99244	0.9944	0.99449	0.997	0.99814	0.99744	0.99835	0.99898	0.99895	0.99928	0.99852	0.99924	1	0.9992	1	0.99958	1	1	1	1	1	1	1	1	1
0.85	0.050911	0.09696	0.17095	0.25523	0.34663	0.43784	0.52327	0.6124	0.66681	0.73311	0.78068	0.82122	0.84221	0.88096	0.90581	0.92729	0.94281	0.9514	0.96283	0.9736	0.97401	0.98464	0.9855	0.98934	0.99271	0.99272	0.99449	0.9955	0.99659	0.99616	1	0.99864	0.99895	0.99964	0.99889	0.99848	1	0.9988	0.99959	0.99958	1	1	1	1	0.99953	1	1	1	1
0.86	0.052051	0.09828	0.16235	0.25361	0.3432	0.43432	0.52453	0.5914	0.6678	0.71979	0.77366	0.81786	0.84956	0.87472	0.90139	0.91955	0.93692	0.9512	0.96514	0.9648	0.97562	0.97984	0.985	0.98596	0.98947	0.9944	0.99391	0.9943	0.99504	0.99744	0.99868	0.9983	0.9993	0.99892	0.99926	0.99962	1	1	1	0.99958	0.99957	0.99912	1	1	1	1	1	1	1
0.87	0.04896	0.09392	0.16045	0.24096	0.33235	0.42624	0.50968	0.59	0.66076	0.71319	0.76586	0.8054	0.84116	0.868	0.8968	0.92279	0.93635	0.9444	0.95989	0.96766	0.97079	0.98104	0.98375	0.98596	0.99271	0.99048	0.99304	0.9928	0.99566	0.99712	0.99703	0.99694	0.99895	0.99892	0.99963	1	0.99883	1	0.99959	1	0.99957	1	1	0.99954	1	1	0.99951	1	1
0.88	0.050311	0.09052	0.1569	0.23928	0.3348	0.41672	0.50149	0.5919	0.64723	0.71319	0.7526	0.79224	0.83171	0.86624	0.88371	0.91595	0.92799	0.9392	0.95674	0.96524	0.96918	0.97792	0.9775	0.9844	0.99163	0.98936	0.99507	0.9961	0.99628	0.99584	0.99835	0.9983	0.99825	0.99892	0.99889	0.99886	0.99922	0.9996	0.99959	1	1	1	1	0.99954	0.99953	1	1	1	1
0.89	0.050221	0.09144	0.15575	0.2313	0.32507	0.4132	0.49383	0.5799	0.63513	0.69555	0.75065	0.80106	0.82856	0.86512	0.88609	0.90335	0.92742	0.9364	0.94435	0.96084	0.9701	0.97408	0.97875	0.98648	0.98974	0.986	0.99188	0.9922	0.99473	0.99488	0.9967	0.99626	0.9979	0.99964	0.99852	0.99886	1	0.9988	1	1	0.99957	0.99956	1	1	1	1	1	1	1
0.9	0.050401	0.089	0.14935	0.2322	0.31968	0.40368	0.48447	0.5655	0.64239	0.69063	0.74324	0.7886	0.82091	0.85024	0.88082	0.90497	0.92761	0.9394	0.9496	0.95842	0.96803	0.97216	0.98	0.98206	0.98839	0.98712	0.99014	0.9901	0.99318	0.99392	0.99505	0.99728	0.9979	0.99784	0.99926	0.9981	0.99883	0.9996	0.99959	0.99916	0.99957	0.99956	1	1	1	1	1	1	1
0.91	0.04923	0.09188	0.1481	0.23094	0.30953	0.40696	0.48762	0.5526	0.62116	0.68727	0.73648	0.7837	0.82751	0.85312	0.87368	0.89921	0.92058	0.9414	0.94792	0.95314	0.96182	0.97408	0.976	0.97842	0.98812	0.98992	0.99072	0.9937	0.99256	0.99648	0.99736	0.9966	0.99685	0.9982	0.99778	0.99734	0.99844	0.9992	0.99877	0.99916	1	1	1	1	1	1	1	1	0.99949
0.92	0.053281	0.08584	0.1456	0.22062	0.30813	0.38904	0.47664	0.5526	0.61478	0.67851	0.724	0.77978	0.82031	0.85056	0.873	0.89759	0.91697	0.9272	0.93973	0.95226	0.96366	0.9712	0.9745	0.98206	0.98434	0.98824	0.98869	0.9916	0.99318	0.99328	0.99703	0.99728	0.99475	0.99712	0.99926	0.99886	0.99922	0.9988	1	0.99874	0.99957	0.99868	1	0.99954	1	0.99952	1	1	1
0.93	0.050281	0.08792	0.1425	0.22074	0.30239	0.38128	0.47034	0.529	0.61368	0.67695	0.73167	0.77026	0.80216	0.83648	0.86841	0.89057	0.9164	0.9272	0.94351	0.95336	0.96044	0.96928	0.97425	0.98154	0.98083	0.98768	0.98956	0.9904	0.9938	0.99424	0.99472	0.9949	0.9965	1	0.99815	0.99962	0.99844	1	0.99918	1	0.99828	0.99912	1	0.99954	1	1	1	1	1
0.94	0.04737	0.08376	0.14075	0.22002	0.29399	0.37752	0.4554	0.5294	0.59597	0.65739	0.72439	0.76312	0.80231	0.83648	0.85719	0.87905	0.91184	0.9204	0.93469	0.95028	0.95768	0.9664	0.96925	0.97712	0.98083	0.98684	0.99101	0.9895	0.9938	0.9936	0.99604	0.99592	0.9972	0.99856	0.99704	0.99772	0.99883	0.9996	0.99877	0.99958	0.99914	1	0.9991	0.99954	0.99953	1	1	1	1
0.95	0.051211	0.08388	0.13295	0.21354	0.29091	0.37784	0.44982	0.5274	0.59795	0.65331	0.71594	0.75094	0.79376	0.83168	0.85515	0.87743	0.90633	0.9252	0.94162	0.94587	0.96205	0.96472	0.96825	0.97504	0.97921	0.98236	0.99014	0.9895	0.98946	0.99456	0.9934	0.99796	0.9972	0.9964	0.99778	0.99734	0.99922	0.9976	1	0.99958	0.99957	0.99956	1	0.99954	1	1	1	1	1
0.96	0.0465	0.082	0.1364	0.20574	0.28496	0.37136	0.43965	0.5235	0.58354	0.65007	0.69514	0.75108	0.78371	0.83008	0.85872	0.87455	0.9012	0.9162	0.93091	0.94543	0.95515	0.96304	0.96975	0.97504	0.98191	0.98628	0.98666	0.9892	0.99008	0.9952	0.99571	0.9949	0.9951	0.99784	0.99778	0.99924	0.99922	0.998	0.99877	0.99916	0.99957	1	1	0.99954	1	1	0.99902	1	0.99949
0.97	0.04815	0.08324	0.13045	0.19836	0.27901	0.36336	0.43947	0.5068	0.59135	0.63975	0.68825	0.74185	0.79211	0.82656	0.84461	0.87401	0.88372	0.9098	0.93217	0.94543	0.95538	0.95872	0.96825	0.97738	0.98056	0.98348	0.98956	0.9865	0.9907	0.99264	0.99604	0.99558	0.9958	0.9964	0.99741	0.99886	0.99922	0.9984	0.99877	0.99958	0.99914	1	0.99955	0.99908	0.99953	0.99952	0.99951	0.9995	0.99949
0.98	0.04767	0.07888	0.1326	0.19974	0.28216	0.3556	0.42831	0.5048	0.57353	0.63831	0.69098	0.74017	0.77321	0.81632	0.84376	0.87077	0.89246	0.9048	0.92377	0.93531	0.9563	0.95632	0.96675	0.97634	0.97597	0.98264	0.98318	0.9871	0.99163	0.99296	0.99406	0.99116	0.99615	0.99604	0.99667	0.99848	0.99922	0.9988	0.99754	0.99916	0.99957	0.99912	0.99955	0.99954	0.99953	1	0.99951	1	1
0.99	0.04485	0.07856	0.12925	0.19662	0.27201	0.35072	0.41877	0.5076	0.56407	0.63147	0.66784	0.72533	0.77186	0.81536	0.83985	0.85655	0.88581	0.9024	0.91747	0.93729	0.93928	0.9556	0.96475	0.96958	0.97678	0.98404	0.98608	0.9841	0.98884	0.9888	0.99175	0.99422	0.99545	0.99568	0.99704	0.99734	0.99688	0.9984	0.99795	0.99874	1	1	0.9991	0.99954	0.99953	0.99952	1	1	0.99949
1	0.04623	0.07992	0.122	0.19284	0.2613	0.34696	0.42282	0.4982	0.55527	0.6197	0.66784	0.72561	0.76781	0.8048	0.83577	0.86303	0.87574	0.9058	0.92125	0.93311	0.9402	0.94672	0.9615	0.96178	0.97732	0.98236	0.98057	0.9868	0.99101	0.99392	0.99373	0.99116	0.9965	0.99604	0.99556	0.99696	0.99727	0.998	0.99918	0.99916	0.99957	0.99956	0.99865	0.99954	0.99953	0.99952	1	1	1
[truncated: 149 more columns]
