# Supplementary material for: Correlation of Dual Colour Single Particle Trajectories for Improved Detection and Analysis of Interactions in Living Cells
Source: Int J Mol Sci. 2013 Aug 8;14(8):16485–514. doi: 10.3390/ijms140816485 (PMC3759922; doi:10.3390/ijms140816485)
Supplement: Supplementary File 1 — Supplementary (ZIP, 5344 KB) [file ijms-14-16485-s001.zip › ijms-35835-Table S2.csv]

	3	4	5	6	7	8	9	10	11	12	13	14	15	16	17	18	19	20	21	22	23	24	25	26	27	28	29	30	31	32	33	34	35	36	37	38	39	40	41	42	43	44	45	46	47	48	49	50	51
0.01	0.99693	0.95043	0.97095	0.99242	0.99323	0.98684	0.99769	0.99835	0.99823	0.99834	0.99855	0.99908	0.99923	0.99913	0.99897	0.9995	0.99945	0.99944	0.99954	0.99956	0.99937	0.99961	0.99938	0.99957	0.99969	0.99965	0.99962	0.99971	0.99976	0.99966	0.99982	0.99974	0.99969	0.99976	0.99982	0.9998	0.99982	0.99979	0.99982	0.9998	0.99982	0.99981	0.99986	0.99984	0.99984	0.99984	0.99983	0.99985	0.99989
0.02	0.99692	0.95013	0.88554	0.89819	0.97208	0.99141	0.98137	0.9934	0.99439	0.99344	0.99521	0.99601	0.99567	0.99676	0.99668	0.99799	0.99818	0.99749	0.99785	0.9975	0.99868	0.99851	0.99814	0.99847	0.99862	0.99825	0.99867	0.99892	0.99818	0.99893	0.99897	0.99854	0.9989	0.99873	0.99922	0.99928	0.99918	0.99936	0.99922	0.99923	0.99922	0.99916	0.99935	0.99906	0.99939	0.99943	0.99946	0.99922	0.99946
0.03	0.99692	0.95003	0.88114	0.91113	0.96123	0.94707	0.96305	0.98471	0.98311	0.98177	0.99042	0.99001	0.99326	0.99436	0.9922	0.99376	0.99472	0.99446	0.99488	0.99461	0.9955	0.99676	0.99654	0.99714	0.99664	0.99763	0.99684	0.99766	0.99707	0.99754	0.99792	0.99759	0.99785	0.99803	0.9977	0.99757	0.99732	0.99768	0.99813	0.99849	0.99737	0.99853	0.99849	0.99873	0.99806	0.99847	0.99875	0.99864	0.99836
0.04	0.99692	0.95004	0.88418	0.87069	0.87853	0.94363	0.97347	0.95911	0.96746	0.98338	0.98274	0.98084	0.98542	0.98582	0.98696	0.98374	0.99066	0.98922	0.99217	0.99094	0.99347	0.99296	0.99364	0.99439	0.99289	0.99581	0.99479	0.99503	0.99411	0.99526	0.99558	0.99623	0.99517	0.99658	0.99683	0.99322	0.9959	0.9967	0.99656	0.99717	0.99738	0.99752	0.99725	0.99706	0.99766	0.99718	0.99701	0.99793	0.99723
0.05	0.99692	0.95001	0.87854	0.81552	0.90537	0.89908	0.89224	0.95699	0.96233	0.96885	0.97484	0.97617	0.97559	0.98264	0.97597	0.9702	0.98292	0.98642	0.98964	0.98873	0.99145	0.98389	0.99173	0.99319	0.99107	0.99026	0.994	0.99211	0.99369	0.9925	0.99392	0.99368	0.99357	0.99391	0.99358	0.99565	0.99355	0.9935	0.99578	0.9954	0.99622	0.99607	0.99665	0.99492	0.99643	0.99639	0.99618	0.99526	0.99596
0.06	0.99692	0.95001	0.88006	0.81709	0.84711	0.83639	0.91055	0.93042	0.94355	0.94854	0.96617	0.97126	0.96858	0.97762	0.97414	0.98307	0.9739	0.98256	0.98487	0.98346	0.98614	0.98022	0.98341	0.98866	0.99045	0.9916	0.9846	0.9855	0.98984	0.99042	0.99083	0.98982	0.99154	0.99261	0.99167	0.99325	0.99374	0.99232	0.9938	0.99334	0.99442	0.99187	0.99341	0.99459	0.98882	0.99421	0.99498	0.99516	0.99571
0.07	0.99692	0.95005	0.87901	0.82002	0.81562	0.73143	0.87539	0.81835	0.92422	0.87478	0.95044	0.9197	0.95585	0.95383	0.94614	0.97147	0.97751	0.95787	0.97848	0.96394	0.97712	0.97713	0.98019	0.98335	0.98524	0.98115	0.98213	0.9831	0.98817	0.98935	0.98833	0.98716	0.98944	0.98684	0.99004	0.98893	0.98721	0.98629	0.98965	0.99	0.98825	0.99253	0.99262	0.99303	0.99127	0.99222	0.99231	0.99028	0.99391
0.08	0.99692	0.95009	0.87873	0.81316	0.78575	0.8418	0.83187	0.86676	0.9182	0.88894	0.92186	0.94595	0.94625	0.95684	0.96519	0.95646	0.96114	0.97608	0.96961	0.97171	0.97179	0.97793	0.97673	0.97826	0.97724	0.98144	0.98466	0.98352	0.9832	0.98622	0.987	0.98906	0.9863	0.98606	0.98804	0.98256	0.98805	0.98519	0.98901	0.99066	0.99166	0.98944	0.99098	0.98868	0.9897	0.99204	0.98826	0.99073	0.99215
0.09	0.99692	0.95002	0.87845	0.81335	0.77751	0.77706	0.77723	0.73392	0.89209	0.80191	0.92243	0.90035	0.90537	0.91261	0.94677	0.95116	0.93116	0.94652	0.96357	0.95873	0.96623	0.96383	0.96935	0.96884	0.96846	0.97726	0.97721	0.9771	0.9755	0.97488	0.98238	0.98139	0.98254	0.98518	0.98484	0.97984	0.98485	0.98375	0.98379	0.98526	0.98663	0.98329	0.98389	0.98826	0.98759	0.98812	0.98778	0.98579	0.98695
0.1	0.99692	0.95001	0.87853	0.81234	0.75969	0.75002	0.7771	0.78239	0.86598	0.76529	0.8243	0.91019	0.92116	0.93433	0.93639	0.94204	0.94821	0.94192	0.9531	0.94531	0.94378	0.93615	0.95999	0.96092	0.94839	0.97125	0.97113	0.97055	0.97578	0.9699	0.97408	0.97777	0.97596	0.97779	0.9819	0.97707	0.97523	0.98204	0.98011	0.97859	0.98468	0.98444	0.98059	0.98297	0.98464	0.98555	0.98759	0.98606	0.98811
0.11	0.99692	0.95	0.87843	0.81243	0.7548	0.73469	0.71342	0.8046	0.84233	0.8872	0.88904	0.91251	0.90576	0.89175	0.91399	0.91845	0.91195	0.95487	0.93003	0.95073	0.95601	0.95324	0.95678	0.95764	0.95213	0.9708	0.96754	0.95739	0.95254	0.96304	0.97008	0.97133	0.97416	0.9611	0.97633	0.97985	0.97326	0.96995	0.9765	0.97689	0.97963	0.98175	0.98285	0.97574	0.98402	0.97983	0.98274	0.9716	0.98137
0.12	0.99692	0.95001	0.87838	0.81144	0.75762	0.7102	0.70492	0.82361	0.78827	0.81403	0.79127	0.85604	0.86054	0.87894	0.91619	0.88667	0.92564	0.93689	0.93377	0.93514	0.93707	0.95168	0.95166	0.95239	0.95295	0.9561	0.96485	0.94473	0.96209	0.96623	0.96718	0.9626	0.96586	0.97496	0.96377	0.9685	0.97772	0.96457	0.97141	0.95554	0.96683	0.97756	0.97719	0.96302	0.97943	0.97532	0.9739	0.98104	0.97772
0.13	0.99692	0.95001	0.87851	0.81254	0.76407	0.71067	0.68362	0.7806	0.78747	0.8039	0.77042	0.82821	0.81311	0.82216	0.86599	0.88806	0.89957	0.9257	0.93163	0.92036	0.89739	0.9276	0.95632	0.94378	0.91809	0.93791	0.95306	0.94304	0.95651	0.95257	0.9675	0.95938	0.96352	0.95757	0.95793	0.97184	0.97089	0.96805	0.97449	0.97483	0.9494	0.96752	0.9675	0.9653	0.97194	0.97461	0.96519	0.96896	0.97793
0.14	0.99692	0.95001	0.87835	0.81141	0.7566	0.72146	0.67842	0.71382	0.71085	0.71262	0.77621	0.81595	0.87174	0.86299	0.86452	0.88384	0.90209	0.8954	0.91193	0.89717	0.90805	0.87292	0.93765	0.91744	0.91706	0.93016	0.9374	0.91698	0.95193	0.93661	0.95087	0.96105	0.9377	0.95632	0.96273	0.95773	0.95348	0.95027	0.93982	0.96474	0.96103	0.96828	0.97139	0.96787	0.96804	0.97234	0.96619	0.95686	0.97716
0.15	0.99692	0.95	0.8785	0.81157	0.75478	0.70704	0.68554	0.69171	0.63964	0.78086	0.59058	0.76649	0.85429	0.86236	0.87849	0.84643	0.87197	0.81354	0.88718	0.89183	0.9036	0.89874	0.92759	0.9223	0.9339	0.94084	0.94499	0.93375	0.93192	0.94187	0.94333	0.94786	0.94248	0.96147	0.93937	0.95989	0.95412	0.96479	0.95586	0.95722	0.95683	0.95833	0.95701	0.95937	0.96846	0.96257	0.96514	0.97682	0.97394
0.16	0.99692	0.95001	0.87844	0.81151	0.75481	0.70721	0.68531	0.68722	0.64147	0.62837	0.64267	0.82478	0.81477	0.7888	0.78166	0.85954	0.85374	0.88527	0.90489	0.88698	0.89678	0.91483	0.92974	0.9188	0.87045	0.92573	0.89226	0.93467	0.92614	0.91448	0.92812	0.94927	0.93163	0.95662	0.95233	0.9514	0.95595	0.96102	0.94366	0.95741	0.9425	0.93354	0.96056	0.95812	0.96336	0.95561	0.96443	0.95276	0.96102
0.17	0.99692	0.95003	0.87836	0.81146	0.75491	0.70754	0.67235	0.65354	0.65865	0.65361	0.69806	0.6791	0.86116	0.79742	0.83399	0.83694	0.83744	0.80814	0.83147	0.87265	0.83868	0.88452	0.87441	0.8965	0.89749	0.8953	0.91371	0.8728	0.9241	0.92457	0.93654	0.94351	0.94307	0.93164	0.93478	0.9446	0.93842	0.92333	0.92326	0.95364	0.9574	0.95436	0.93851	0.96175	0.95517	0.95787	0.95594	0.96236	0.96062
0.18	0.99692	0.95	0.8784	0.81182	0.7548	0.71108	0.67638	0.65462	0.63901	0.63972	0.67164	0.70319	0.68461	0.74938	0.73304	0.7533	0.8404	0.819	0.85035	0.85183	0.87477	0.86589	0.87393	0.88287	0.91673	0.89938	0.90236	0.91503	0.92589	0.90476	0.9324	0.9323	0.92826	0.93907	0.93282	0.92332	0.92937	0.93835	0.93827	0.94959	0.9427	0.94844	0.94646	0.95384	0.94946	0.93601	0.9438	0.95115	0.94081
0.19	0.99692	0.95001	0.87847	0.81175	0.7545	0.70922	0.66744	0.65461	0.68281	0.64299	0.64355	0.66107	0.70996	0.75064	0.81869	0.77174	0.75436	0.80253	0.78368	0.83702	0.84991	0.87276	0.86533	0.8667	0.90214	0.86479	0.87252	0.90873	0.90503	0.89225	0.92137	0.90793	0.92168	0.91956	0.92246	0.92647	0.92637	0.92375	0.9303	0.93486	0.92958	0.95335	0.93002	0.93536	0.94261	0.94296	0.94685	0.9536	0.94621
0.2	0.99692	0.95002	0.87835	0.81144	0.7553	0.70695	0.66671	0.63714	0.6143	0.64676	0.71334	0.68386	0.695	0.76917	0.75781	0.81624	0.75391	0.73401	0.81651	0.85621	0.83887	0.86557	0.84147	0.86169	0.88635	0.85767	0.89057	0.90982	0.89354	0.91107	0.90472	0.88923	0.89172	0.89015	0.89735	0.90239	0.90463	0.90971	0.93109	0.94248	0.93245	0.92465	0.91975	0.93592	0.94649	0.91672	0.94659	0.92742	0.94289
0.21	0.99692	0.95	0.87838	0.8115	0.75475	0.70692	0.67067	0.63503	0.61004	0.58125	0.64771	0.66989	0.63579	0.65632	0.69293	0.81909	0.7791	0.73759	0.8297	0.84237	0.8096	0.84486	0.83846	0.86586	0.81187	0.88054	0.89404	0.85389	0.90552	0.85407	0.88622	0.91876	0.83049	0.92969	0.91488	0.90701	0.92807	0.90901	0.93082	0.92343	0.91288	0.92281	0.90986	0.91966	0.92789	0.94788	0.92748	0.92988	0.93786
0.22	0.99692	0.95001	0.8784	0.81156	0.75475	0.70691	0.66789	0.63531	0.60608	0.5804	0.66764	0.61984	0.60224	0.72949	0.72464	0.78008	0.76237	0.77096	0.75589	0.79878	0.8262	0.8466	0.8676	0.83778	0.84313	0.88268	0.83779	0.86673	0.86531	0.87285	0.88132	0.89642	0.88904	0.9026	0.91144	0.91334	0.92672	0.90406	0.91591	0.91915	0.919	0.92891	0.94047	0.92646	0.91929	0.93118	0.91724	0.8972	0.93849
0.23	0.99692	0.95	0.87834	0.8114	0.75457	0.70728	0.6673	0.6322	0.6054	0.60203	0.62528	0.61648	0.67706	0.70165	0.62507	0.73372	0.70155	0.76452	0.77119	0.83748	0.82395	0.79233	0.795	0.75206	0.81823	0.85743	0.87588	0.87707	0.86618	0.85653	0.87892	0.87748	0.87837	0.88916	0.87475	0.91288	0.91493	0.89987	0.90592	0.91092	0.92094	0.8979	0.90494	0.90161	0.90073	0.92998	0.93277	0.93043	0.92376
0.24	0.99692	0.95001	0.87836	0.81155	0.75458	0.70743	0.66643	0.63834	0.61118	0.60955	0.57571	0.63885	0.54347	0.57318	0.52155	0.54096	0.58872	0.67375	0.69223	0.79226	0.79807	0.76547	0.81346	0.82655	0.85312	0.79949	0.84711	0.80377	0.84985	0.81289	0.88897	0.86165	0.89006	0.88583	0.89864	0.86097	0.87769	0.82956	0.87197	0.88128	0.92238	0.87579	0.91368	0.92513	0.87802	0.92692	0.89191	0.8758	0.91662
0.25	0.99692	0.95001	0.8784	0.81144	0.75463	0.70777	0.66685	0.63294	0.60512	0.60049	0.59108	0.54447	0.54823	0.62324	0.71902	0.574	0.72063	0.6399	0.71518	0.729	0.78205	0.73905	0.8225	0.79359	0.81663	0.7842	0.86655	0.85163	0.88705	0.86165	0.86375	0.86002	0.85947	0.88649	0.85841	0.90673	0.84635	0.88851	0.89327	0.88432	0.9118	0.90175	0.8998	0.88593	0.90638	0.90419	0.88248	0.91005	0.90033
0.26	0.99692	0.95001	0.87836	0.81141	0.75451	0.70686	0.66694	0.63575	0.61907	0.59551	0.5741	0.61681	0.61913	0.53713	0.63716	0.70609	0.7146	0.75766	0.74114	0.7518	0.69756	0.76825	0.77254	0.79109	0.76534	0.79511	0.80167	0.81661	0.863	0.76566	0.84115	0.84185	0.87117	0.86448	0.85639	0.86096	0.86062	0.88957	0.79869	0.9122	0.90501	0.89692	0.86263	0.91021	0.91306	0.90965	0.91148	0.88745	0.88457
0.27	0.99692	0.95001	0.87835	0.81143	0.75471	0.70703	0.66698	0.63254	0.60591	0.58325	0.57438	0.55546	0.57488	0.50692	0.50351	0.68379	0.67387	0.69744	0.66408	0.43555	0.69252	0.79985	0.76061	0.67842	0.79316	0.78805	0.74408	0.81501	0.82986	0.74478	0.82763	0.82582	0.85817	0.84081	0.87123	0.87277	0.87793	0.86879	0.86086	0.86103	0.85572	0.87553	0.85283	0.85913	0.90998	0.89529	0.91105	0.8916	0.89078
0.28	0.99692	0.95001	0.87835	0.81148	0.75467	0.70719	0.66655	0.63216	0.60397	0.59194	0.5668	0.55841	0.54642	0.63144	0.56492	0.62998	0.65203	0.67451	0.56994	0.78194	0.74759	0.75395	0.75132	0.74677	0.76713	0.79437	0.82007	0.83878	0.72156	0.8087	0.8015	0.77995	0.79553	0.84517	0.85153	0.84554	0.84654	0.82888	0.84012	0.88374	0.86689	0.8248	0.87403	0.88088	0.89589	0.91312	0.89195	0.89023	0.83764
0.29	0.99692	0.95003	0.87843	0.81142	0.75478	0.7078	0.66648	0.63435	0.61088	0.57754	0.55733	0.53442	0.52851	0.54097	0.58832	0.56389	0.63077	0.53717	0.73745	0.67332	0.72374	0.65528	0.78578	0.69952	0.80616	0.73748	0.8127	0.75646	0.77629	0.74756	0.78344	0.83106	0.7685	0.79296	0.8238	0.84637	0.78411	0.86468	0.86968	0.87959	0.87915	0.86538	0.86656	0.87832	0.85351	0.87828	0.88711	0.8931	0.8729
0.3	0.99692	0.95	0.87834	0.81144	0.75457	0.70691	0.66675	0.63218	0.60248	0.57677	0.55494	0.54074	0.52307	0.54303	0.50214	0.58996	0.6411	0.68638	0.66906	0.66657	0.71193	0.64866	0.73083	0.69241	0.75511	0.65819	0.72551	0.78701	0.73437	0.72108	0.793	0.82218	0.81413	0.84763	0.82901	0.77133	0.76975	0.8279	0.85936	0.85647	0.85349	0.87571	0.87534	0.83571	0.86662	0.87572	0.86423	0.87991	0.88899
0.31	0.99692	0.95	0.87834	0.81143	0.75466	0.70681	0.66661	0.6323	0.60237	0.57718	0.55549	0.53379	0.52662	0.50229	0.56296	0.57606	0.58219	0.54247	0.45136	0.52524	0.60105	0.50954	0.65793	0.6253	0.77865	0.75142	0.81581	0.7575	0.74921	0.77647	0.82174	0.81372	0.78088	0.83025	0.82392	0.82814	0.82958	0.8301	0.83788	0.81417	0.85071	0.75426	0.85276	0.86622	0.88065	0.88961	0.88224	0.88879	0.84237
0.32	0.99692	0.95001	0.87834	0.81143	0.7545	0.70693	0.6666	0.63364	0.60808	0.58689	0.5597	0.53867	0.56651	0.50169	0.49708	0.52396	0.53931	0.53457	0.48682	0.58118	0.47723	0.71018	0.72707	0.74235	0.73488	0.76756	0.73927	0.63373	0.73518	0.81033	0.82274	0.78958	0.72846	0.78111	0.81088	0.78141	0.77919	0.80067	0.82371	0.84314	0.8486	0.85037	0.83071	0.85179	0.8265	0.84537	0.86979	0.85839	0.86912
0.33	0.99692	0.95001	0.87834	0.81148	0.75452	0.70694	0.66656	0.63226	0.60266	0.5765	0.55314	0.53269	0.52215	0.52692	0.48821	0.50705	0.55411	0.56513	0.55568	0.59118	0.60584	0.69423	0.73185	0.73407	0.70998	0.72983	0.70513	0.69161	0.77725	0.73298	0.67601	0.74352	0.73398	0.80818	0.8226	0.79517	0.8358	0.80848	0.83922	0.83221	0.82356	0.85731	0.81923	0.84532	0.82259	0.87468	0.85539	0.86953	0.83684
0.34	0.99692	0.95001	0.87834	0.81144	0.75454	0.70676	0.66652	0.63203	0.60433	0.57677	0.55687	0.54253	0.53914	0.49865	0.50183	0.50409	0.51158	0.52675	0.47631	0.63939	0.51758	0.63199	0.69882	0.71235	0.68225	0.73328	0.66793	0.75403	0.7699	0.64607	0.78875	0.72369	0.67832	0.76966	0.75175	0.79488	0.7873	0.84764	0.86314	0.81729	0.82718	0.83575	0.8528	0.81323	0.82581	0.78128	0.85851	0.83752	0.88868
0.35	0.99692	0.95001	0.87836	0.81145	0.7547	0.70692	0.66658	0.63239	0.60405	0.5762	0.55311	0.53742	0.52255	0.49735	0.5071	0.49458	0.59465	0.61035	0.62718	0.65652	0.53477	0.67977	0.65301	0.72875	0.67979	0.64508	0.76058	0.7255	0.70382	0.6731	0.73536	0.79188	0.796	0.78353	0.76993	0.81809	0.79387	0.78097	0.78635	0.80928	0.72162	0.78308	0.80638	0.84472	0.75484	0.83344	0.8249	0.84572	0.85601
0.36	0.99692	0.95001	0.87834	0.81141	0.75467	0.70685	0.66662	0.63283	0.60223	0.57751	0.55494	0.54485	0.52304	0.54193	0.53608	0.48137	0.5014	0.50189	0.47043	0.52501	0.43408	0.62712	0.51948	0.69918	0.65254	0.58121	0.70118	0.61623	0.67166	0.66748	0.74492	0.66695	0.72984	0.73184	0.76459	0.61413	0.80505	0.7878	0.78978	0.82629	0.79789	0.81941	0.84008	0.83389	0.83474	0.79147	0.83844	0.86138	0.84113
0.37	0.99692	0.95	0.87834	0.8114	0.75466	0.70679	0.66653	0.63232	0.6022	0.5777	0.55363	0.53529	0.51978	0.52926	0.49758	0.50012	0.52807	0.58226	0.4941	0.54066	0.60104	0.58059	0.62399	0.59522	0.58422	0.70878	0.70856	0.66736	0.64977	0.72198	0.67716	0.73744	0.79342	0.666	0.763	0.7714	0.8044	0.8102	0.79319	0.77408	0.81905	0.75041	0.70037	0.7854	0.75879	0.8343	0.80155	0.83294	0.84488
0.38	0.99692	0.95	0.87836	0.81147	0.7545	0.70687	0.66674	0.63193	0.6022	0.57648	0.55481	0.53672	0.51991	0.50561	0.49625	0.50348	0.47471	0.52245	0.4473	0.56077	0.51432	0.6687	0.67282	0.59759	0.66935	0.67613	0.6508	0.70953	0.73404	0.69944	0.71418	0.60743	0.73784	0.67598	0.72073	0.73742	0.79561	0.76492	0.76089	0.73819	0.76854	0.7448	0.81405	0.81958	0.83329	0.80749	0.83056	0.80976	0.82811
0.39	0.99692	0.95	0.87834	0.81142	0.75451	0.70699	0.66639	0.63238	0.60373	0.576	0.56501	0.53243	0.51886	0.49759	0.49782	0.49803	0.48909	0.44907	0.5422	0.48207	0.63286	0.63541	0.55903	0.60616	0.65966	0.69036	0.65372	0.5839	0.64073	0.69714	0.65753	0.72041	0.72265	0.71982	0.72902	0.76628	0.76659	0.75879	0.75324	0.73207	0.80936	0.79801	0.8277	0.76754	0.79375	0.74584	0.80905	0.78572	0.77739
0.4	0.99692	0.95	0.87834	0.81144	0.75465	0.70681	0.66645	0.6319	0.60224	0.57627	0.55515	0.53331	0.5143	0.49896	0.494	0.47028	0.47625	0.46821	0.43351	0.5002	0.48687	0.43346	0.62476	0.4888	0.60748	0.68556	0.45482	0.67069	0.68243	0.53295	0.74021	0.58708	0.74705	0.68353	0.72919	0.73019	0.72403	0.71454	0.76387	0.76924	0.76809	0.79284	0.77026	0.76897	0.77916	0.79232	0.78642	0.77395	0.81048
0.41	0.99692	0.95	0.87835	0.81146	0.75456	0.70677	0.66645	0.63217	0.60208	0.57611	0.55413	0.53352	0.51712	0.54575	0.49262	0.48263	0.50672	0.4905	0.47444	0.50228	0.46403	0.53767	0.64489	0.61777	0.41609	0.51617	0.63176	0.60881	0.65719	0.67449	0.59717	0.63794	0.62563	0.64472	0.71908	0.6828	0.73539	0.77167	0.62469	0.78628	0.70329	0.76393	0.72165	0.79394	0.76071	0.80687	0.70577	0.76192	0.74092
0.42	0.99692	0.95003	0.87835	0.81145	0.7545	0.70674	0.66642	0.63212	0.60341	0.57662	0.55392	0.53347	0.51977	0.50085	0.48984	0.49038	0.48755	0.44971	0.45617	0.43403	0.58574	0.546	0.50705	0.44942	0.58505	0.56667	0.66353	0.63269	0.58287	0.54666	0.70583	0.71767	0.7161	0.74123	0.68865	0.75191	0.68885	0.69723	0.66582	0.72551	0.71875	0.70651	0.76447	0.76987	0.79369	0.77548	0.78632	0.79261	0.73498
0.43	0.99692	0.95001	0.87834	0.81148	0.7545	0.70687	0.66643	0.63204	0.60227	0.57619	0.55381	0.53244	0.51472	0.506	0.48273	0.47616	0.46696	0.46012	0.44171	0.45559	0.50061	0.42191	0.43686	0.46928	0.62282	0.56295	0.56038	0.38759	0.66112	0.58556	0.59567	0.65417	0.69972	0.71903	0.69493	0.69848	0.71842	0.62371	0.71816	0.73833	0.75858	0.6747	0.64878	0.79216	0.80374	0.77022	0.76624	0.7913	0.76559
0.44	0.99692	0.95001	0.87834	0.81143	0.7546	0.70686	0.66639	0.63194	0.60211	0.57863	0.55326	0.53275	0.51478	0.49795	0.48655	0.47734	0.47532	0.48979	0.45829	0.4916	0.52186	0.49109	0.46692	0.44395	0.51844	0.55649	0.60324	0.52422	0.57566	0.61893	0.67125	0.58069	0.5803	0.59843	0.57277	0.71019	0.64822	0.69202	0.69147	0.72797	0.71944	0.71567	0.72516	0.72978	0.7653	0.76535	0.62425	0.79628	0.77559
0.45	0.99692	0.95	0.87835	0.8114	0.75453	0.70679	0.66675	0.63208	0.60212	0.57607	0.55445	0.5325	0.51539	0.50062	0.48547	0.47016	0.48415	0.46137	0.43753	0.47133	0.47864	0.49161	0.52621	0.57202	0.42402	0.51394	0.50825	0.52723	0.64002	0.48926	0.59423	0.64272	0.68713	0.63381	0.69095	0.67102	0.59185	0.72	0.73127	0.66379	0.65404	0.76536	0.72053	0.7416	0.7297	0.77911	0.68023	0.78464	0.77238
0.46	0.99692	0.95	0.87834	0.8114	0.75451	0.70684	0.66642	0.63192	0.60207	0.57652	0.55327	0.53274	0.51496	0.49866	0.49298	0.47564	0.47624	0.47194	0.45473	0.43863	0.48684	0.543	0.51036	0.4973	0.60281	0.52513	0.55217	0.57684	0.5392	0.59133	0.51426	0.66435	0.55901	0.67424	0.71216	0.65444	0.64674	0.65036	0.66202	0.70785	0.734	0.70912	0.62594	0.78194	0.66789	0.78355	0.71576	0.7177	0.75072
0.47	0.99692	0.95001	0.87839	0.81152	0.75451	0.70675	0.66657	0.63214	0.60246	0.57649	0.55369	0.53313	0.5142	0.49999	0.48822	0.47041	0.46938	0.46175	0.43572	0.44378	0.4509	0.41087	0.4604	0.55246	0.48549	0.42459	0.58218	0.61388	0.5866	0.56125	0.4567	0.62332	0.51515	0.64421	0.68893	0.69328	0.66257	0.68604	0.72375	0.62687	0.64656	0.7071	0.67306	0.70932	0.77199	0.68025	0.7261	0.7416	0.7458
0.48	0.99692	0.95003	0.87836	0.81143	0.75452	0.70698	0.66665	0.6319	0.60239	0.5765	0.55395	0.5327	0.51557	0.49792	0.49317	0.46883	0.47148	0.47344	0.44442	0.47873	0.478	0.43037	0.48199	0.47814	0.50179	0.48615	0.46933	0.59186	0.41564	0.5789	0.61695	0.55344	0.62525	0.60546	0.63294	0.6105	0.63441	0.65728	0.60617	0.64541	0.71394	0.5894	0.65892	0.68776	0.6637	0.71816	0.70302	0.75949	0.64059
0.49	0.99692	0.95001	0.87835	0.81141	0.75455	0.7068	0.66658	0.63202	0.60236	0.57683	0.55353	0.53497	0.51482	0.50013	0.49093	0.47326	0.46841	0.47106	0.48037	0.45316	0.46651	0.4205	0.4236	0.43529	0.54667	0.38437	0.52702	0.49932	0.57252	0.49193	0.57387	0.6399	0.63828	0.58991	0.60915	0.534	0.59042	0.62903	0.65613	0.64656	0.59462	0.71041	0.75196	0.69061	0.71662	0.72116	0.69806	0.70735	0.75603
0.5	0.99692	0.95001	0.87834	0.81141	0.75449	0.70681	0.66654	0.63212	0.60257	0.57636	0.55323	0.53411	0.51491	0.49886	0.48247	0.47863	0.46807	0.45138	0.44337	0.44715	0.41605	0.44428	0.42638	0.50369	0.52864	0.41507	0.41437	0.5429	0.43195	0.47361	0.52493	0.44342	0.61263	0.52382	0.61383	0.65268	0.60236	0.65756	0.66107	0.68614	0.62533	0.66629	0.69673	0.64664	0.60221	0.70121	0.73784	0.71889	0.72277
0.51	0.99692	0.95	0.8784	0.8114	0.75454	0.70674	0.66671	0.63202	0.60313	0.57673	0.55336	0.53318	0.51398	0.49751	0.48573	0.4831	0.46601	0.45502	0.45148	0.45322	0.43945	0.42749	0.49391	0.43884	0.51196	0.44127	0.41501	0.48127	0.44113	0.51727	0.60156	0.53669	0.61136	0.56797	0.57739	0.57711	0.4533	0.65514	0.67285	0.61493	0.70172	0.65756	0.70469	0.66897	0.57807	0.62126	0.74968	0.69148	0.71739
0.52	0.99692	0.95001	0.87837	0.81144	0.7545	0.70683	0.66656	0.63197	0.60211	0.57628	0.55298	0.53301	0.51818	0.49889	0.48953	0.47366	0.45572	0.45244	0.43563	0.44302	0.45599	0.41362	0.42578	0.39315	0.39341	0.4378	0.43125	0.4609	0.41672	0.56802	0.57424	0.56633	0.61879	0.55533	0.62191	0.59105	0.52019	0.65931	0.5721	0.6425	0.68622	0.69446	0.63167	0.67153	0.54014	0.7027	0.63882	0.62432	0.73292
0.53	0.99692	0.95001	0.87836	0.81146	0.75467	0.70692	0.66649	0.63201	0.60222	0.57636	0.55331	0.53303	0.51399	0.49781	0.48268	0.47245	0.46462	0.45032	0.43966	0.4235	0.42409	0.41031	0.43242	0.4584	0.50806	0.5328	0.46726	0.55025	0.5013	0.48293	0.53367	0.46005	0.55706	0.46111	0.62313	0.58201	0.6108	0.57318	0.64419	0.67126	0.6492	0.64666	0.67438	0.65759	0.64424	0.71941	0.60989	0.66799	0.68836
0.54	0.99692	0.95006	0.87835	0.81141	0.75453	0.70686	0.66648	0.63221	0.60227	0.57606	0.5535	0.5327	0.51484	0.49765	0.48465	0.46941	0.45611	0.44939	0.44369	0.44095	0.41491	0.42266	0.438	0.42635	0.49513	0.40842	0.44072	0.50769	0.50148	0.46949	0.58351	0.44551	0.61071	0.53674	0.53308	0.57243	0.56949	0.62891	0.62713	0.52291	0.62616	0.65793	0.60646	0.65917	0.6615	0.65639	0.68279	0.60498	0.68422
0.55	0.99692	0.95001	0.87837	0.8114	0.75453	0.70687	0.66651	0.63191	0.60239	0.57602	0.55345	0.5326	0.51446	0.49753	0.48375	0.47445	0.45803	0.44594	0.44527	0.45036	0.41343	0.41367	0.43258	0.42427	0.41242	0.38921	0.4085	0.43848	0.45163	0.51528	0.50711	0.52383	0.44449	0.60077	0.44992	0.52669	0.56979	0.62781	0.61951	0.64918	0.52082	0.55208	0.50785	0.56225	0.71052	0.61214	0.6748	0.68349	0.60241
0.56	0.99692	0.95001	0.87834	0.81141	0.75455	0.70683	0.66642	0.63192	0.60209	0.57637	0.55317	0.53264	0.51417	0.49874	0.48504	0.47162	0.45563	0.44554	0.4425	0.42585	0.41646	0.42208	0.43078	0.44877	0.47331	0.47757	0.50918	0.40673	0.49963	0.50737	0.45179	0.49658	0.53369	0.5566	0.41286	0.36545	0.62396	0.46086	0.57224	0.58304	0.54261	0.5618	0.65378	0.57908	0.51758	0.68813	0.65592	0.68862	0.60401
0.57	0.99692	0.95	0.87839	0.81147	0.75458	0.70674	0.6664	0.632	0.60222	0.57612	0.55362	0.53258	0.51405	0.49747	0.48377	0.4711	0.45672	0.44854	0.43455	0.4229	0.41541	0.43004	0.41246	0.40855	0.38894	0.39984	0.39619	0.41772	0.52496	0.55384	0.4977	0.48736	0.48551	0.55092	0.56832	0.6046	0.51933	0.6097	0.57991	0.50043	0.59416	0.54657	0.63493	0.64653	0.56622	0.63894	0.6161	0.64696	0.62032
0.58	0.99692	0.95	0.87835	0.81143	0.75451	0.70692	0.66642	0.63194	0.60213	0.57606	0.5531	0.53246	0.514	0.49734	0.48389	0.46831	0.45654	0.44477	0.4381	0.42656	0.41742	0.40692	0.427	0.42487	0.3876	0.44459	0.37939	0.46912	0.36074	0.3899	0.36747	0.39387	0.54114	0.47752	0.46182	0.60656	0.54907	0.61306	0.59242	0.57619	0.50276	0.51884	0.56331	0.68618	0.63236	0.60895	0.65873	0.67919	0.50801
0.59	0.99692	0.95002	0.87835	0.8114	0.75463	0.70686	0.66645	0.63216	0.60207	0.57611	0.55388	0.53247	0.5145	0.49798	0.48251	0.46883	0.45563	0.44827	0.43925	0.44125	0.42489	0.43024	0.41479	0.39209	0.38493	0.44449	0.47764	0.41762	0.36275	0.4546	0.40418	0.39267	0.49637	0.49826	0.51324	0.47554	0.52428	0.54613	0.38575	0.43625	0.58305	0.43396	0.56403	0.56048	0.59632	0.64369	0.56057	0.62077	0.70216
0.6	0.99692	0.95	0.87835	0.81141	0.75452	0.70675	0.66645	0.63191	0.60217	0.57609	0.55333	0.53252	0.51413	0.49763	0.48227	0.47018	0.45893	0.44426	0.44118	0.44164	0.42185	0.4085	0.40606	0.41303	0.40174	0.43688	0.42624	0.38782	0.50742	0.40229	0.4623	0.50455	0.49341	0.50617	0.54303	0.58344	0.60796	0.5757	0.53921	0.54738	0.48711	0.63652	0.62344	0.61021	0.65561	0.56387	0.63074	0.52287	0.62775
0.61	0.99692	0.95001	0.87836	0.81146	0.75451	0.70684	0.66672	0.63201	0.60223	0.576	0.55342	0.53266	0.51523	0.49738	0.48248	0.46945	0.45829	0.44667	0.43659	0.42492	0.42697	0.41451	0.41324	0.42171	0.39442	0.46922	0.44327	0.37801	0.39986	0.41304	0.438	0.44419	0.41556	0.43037	0.34932	0.53907	0.49604	0.52438	0.52147	0.55385	0.60644	0.57982	0.60715	0.55655	0.58111	0.57825	0.58737	0.56043	0.63061
0.62	0.99692	0.95001	0.87836	0.81151	0.7545	0.70687	0.66646	0.6319	0.60218	0.57614	0.55314	0.5325	0.51416	0.49778	0.48318	0.47056	0.45569	0.45142	0.43741	0.42493	0.42381	0.40623	0.39702	0.40793	0.39673	0.4725	0.37871	0.41071	0.36007	0.40351	0.44958	0.36747	0.46691	0.44242	0.40139	0.39626	0.54084	0.55655	0.56648	0.46871	0.54183	0.54802	0.48468	0.62352	0.58627	0.63155	0.61199	0.57645	0.6173
0.63	0.99692	0.95001	0.87835	0.81146	0.75454	0.70675	0.6664	0.63214	0.60216	0.57599	0.55361	0.53265	0.51444	0.49753	0.48284	0.46862	0.45645	0.4463	0.43416	0.42324	0.42037	0.43119	0.42718	0.39823	0.40732	0.38291	0.42496	0.44679	0.43927	0.38394	0.40416	0.36993	0.54086	0.5026	0.45928	0.47127	0.54288	0.48927	0.47361	0.51059	0.58036	0.53654	0.53736	0.4897	0.61102	0.55348	0.4879	0.60478	0.53914
0.64	0.99692	0.95001	0.87835	0.81141	0.75459	0.70689	0.66646	0.6319	0.60222	0.57626	0.55316	0.53243	0.51479	0.49897	0.48251	0.47131	0.45572	0.44635	0.43488	0.42471	0.41865	0.40492	0.42097	0.39062	0.38681	0.3751	0.46755	0.37162	0.39266	0.42569	0.41896	0.44807	0.36637	0.45999	0.48007	0.50613	0.45064	0.47664	0.52002	0.53681	0.42494	0.49045	0.50566	0.55786	0.6277	0.59588	0.63255	0.62204	0.61861
0.65	0.99692	0.95001	0.87849	0.81153	0.7545	0.70677	0.66647	0.63191	0.60217	0.57608	0.55314	0.53256	0.51445	0.49733	0.48288	0.46844	0.45727	0.44387	0.43473	0.42571	0.41433	0.41468	0.3983	0.39294	0.40556	0.39695	0.38409	0.36435	0.43703	0.42759	0.4532	0.41766	0.38754	0.35145	0.43345	0.36895	0.49853	0.50406	0.39793	0.49556	0.4953	0.53059	0.55223	0.56273	0.52378	0.55919	0.57976	0.47377	0.63403
0.66	0.99692	0.95002	0.87839	0.81141	0.7545	0.70682	0.66639	0.63192	0.60218	0.57602	0.55309	0.53266	0.51487	0.49767	0.48238	0.46961	0.45626	0.44405	0.43341	0.42293	0.42158	0.4105	0.41372	0.40626	0.38578	0.37905	0.38627	0.4208	0.36682	0.43316	0.34925	0.35196	0.47386	0.43167	0.48114	0.48292	0.39215	0.37976	0.44508	0.48218	0.47718	0.57336	0.46002	0.53271	0.58614	0.6008	0.58621	0.60205	0.59635
0.67	0.99692	0.95001	0.87835	0.81142	0.7545	0.70679	0.66647	0.63197	0.60208	0.57631	0.55296	0.53309	0.51441	0.49831	0.48266	0.46903	0.45723	0.44426	0.43544	0.42664	0.41415	0.41186	0.40106	0.38975	0.38855	0.39202	0.38902	0.37967	0.40078	0.40686	0.37541	0.37688	0.42477	0.37228	0.41899	0.38283	0.47772	0.47438	0.47682	0.5288	0.51563	0.54942	0.47255	0.54635	0.62374	0.60305	0.56044	0.55215	0.52845
0.68	0.99692	0.95002	0.87834	0.81147	0.7545	0.70674	0.66641	0.63212	0.60231	0.57601	0.55298	0.53262	0.51424	0.49829	0.483	0.46843	0.45646	0.44436	0.43299	0.42293	0.4192	0.40594	0.41161	0.39209	0.38901	0.38484	0.38126	0.36195	0.41357	0.43179	0.38803	0.39449	0.36574	0.44667	0.4803	0.42632	0.47853	0.51792	0.39119	0.38604	0.49353	0.47327	0.51854	0.46788	0.51248	0.5273	0.5643	0.48948	0.49848
0.69	0.99692	0.95	0.87835	0.81144	0.75455	0.70687	0.66661	0.63199	0.60209	0.57617	0.55376	0.53244	0.51432	0.49781	0.48248	0.46831	0.45599	0.44455	0.43509	0.42321	0.41728	0.41275	0.39967	0.40039	0.38759	0.38286	0.3907	0.4023	0.3722	0.35541	0.40432	0.35671	0.43216	0.38227	0.44613	0.41059	0.47117	0.39406	0.48991	0.31726	0.49746	0.52052	0.56203	0.49544	0.48221	0.52019	0.57759	0.51244	0.51885
0.7	0.99692	0.95	0.87835	0.81142	0.75453	0.70678	0.66652	0.63205	0.6021	0.57612	0.55339	0.53262	0.514	0.49741	0.48216	0.46829	0.4556	0.44785	0.43388	0.42297	0.41401	0.40493	0.40057	0.38825	0.38597	0.37682	0.39498	0.4618	0.38017	0.35177	0.34708	0.4781	0.34138	0.44985	0.32825	0.35628	0.40695	0.4301	0.49596	0.48791	0.47045	0.43061	0.47745	0.54223	0.5974	0.4764	0.54373	0.52884	0.5937
0.71	0.99692	0.95001	0.87836	0.81145	0.75451	0.70676	0.66643	0.63213	0.60208	0.57608	0.55308	0.53251	0.51457	0.49875	0.4827	0.46924	0.4557	0.44441	0.43418	0.42711	0.41474	0.40982	0.39632	0.39332	0.38269	0.39102	0.39135	0.37751	0.37562	0.4408	0.34962	0.42509	0.4319	0.38335	0.32531	0.35879	0.45789	0.48462	0.36566	0.40716	0.32733	0.41578	0.48867	0.49909	0.57227	0.54352	0.55636	0.55086	0.50942
0.72	0.99692	0.95	0.87834	0.81145	0.75455	0.70676	0.66648	0.63203	0.60207	0.57608	0.55296	0.53249	0.51433	0.49738	0.48278	0.46865	0.45571	0.44432	0.4336	0.42367	0.41593	0.42039	0.40434	0.39486	0.38198	0.37475	0.37044	0.38353	0.42397	0.35499	0.36643	0.3955	0.41687	0.41029	0.47806	0.39834	0.32623	0.40178	0.39423	0.47052	0.50483	0.36755	0.35216	0.51545	0.48628	0.52563	0.49893	0.51758	0.44992
0.73	0.99692	0.95004	0.87841	0.81146	0.7545	0.70678	0.66641	0.63194	0.60213	0.57612	0.55297	0.5325	0.51425	0.49751	0.48239	0.46831	0.45559	0.44546	0.43571	0.42338	0.41356	0.40995	0.39958	0.38852	0.38147	0.38313	0.36936	0.39776	0.40561	0.35617	0.34519	0.3649	0.34542	0.38754	0.44785	0.4403	0.35269	0.44369	0.46536	0.45231	0.51072	0.47399	0.40277	0.47294	0.48461	0.55822	0.48624	0.45613	0.52738
0.74	0.99692	0.95001	0.87838	0.81142	0.75451	0.70674	0.6664	0.63205	0.60209	0.57601	0.55299	0.5329	0.51405	0.49736	0.48249	0.46859	0.45557	0.44493	0.43336	0.42343	0.41541	0.40808	0.40262	0.39007	0.38468	0.37767	0.38649	0.36201	0.37647	0.36381	0.39197	0.37802	0.3694	0.39768	0.37802	0.36217	0.46093	0.42442	0.46007	0.42371	0.4775	0.46414	0.38189	0.51689	0.44562	0.54436	0.53632	0.47761	0.58219
0.75	0.99692	0.95002	0.87834	0.81143	0.75452	0.70676	0.66646	0.63213	0.6021	0.576	0.55304	0.53251	0.51495	0.49748	0.4822	0.46873	0.45677	0.44436	0.43286	0.42332	0.41332	0.40539	0.40273	0.38957	0.3828	0.37565	0.37067	0.42023	0.38469	0.36035	0.34911	0.39691	0.34013	0.35532	0.39699	0.4428	0.477	0.43601	0.43426	0.40418	0.40363	0.49493	0.46151	0.43333	0.43967	0.56054	0.49986	0.5452	0.4431
0.76	0.99692	0.95	0.87834	0.8114	0.75453	0.70676	0.66643	0.63192	0.60207	0.57609	0.55308	0.53282	0.51407	0.49748	0.48302	0.46909	0.45594	0.44405	0.43672	0.42516	0.41509	0.40585	0.4042	0.39001	0.3829	0.38688	0.37413	0.3761	0.36225	0.38218	0.34501	0.36186	0.33413	0.41558	0.39184	0.38708	0.38017	0.38753	0.32184	0.47517	0.51556	0.45986	0.35145	0.38824	0.49816	0.50505	0.45041	0.481	0.59452
0.77	0.99692	0.95003	0.87834	0.81141	0.7545	0.70678	0.66641	0.632	0.60216	0.57604	0.55315	0.53243	0.51419	0.4975	0.4825	0.4683	0.45556	0.4438	0.43394	0.42319	0.41351	0.40591	0.40393	0.3887	0.3947	0.37421	0.38099	0.36245	0.3576	0.36006	0.39955	0.34608	0.368	0.37157	0.40669	0.40739	0.34783	0.37867	0.35481	0.38604	0.41503	0.45456	0.42422	0.47665	0.46722	0.48894	0.34232	0.43148	0.42112
0.78	0.99692	0.95001	0.87837	0.81142	0.75449	0.7068	0.66639	0.63196	0.6022	0.57635	0.55294	0.53251	0.51406	0.49787	0.48277	0.46851	0.45617	0.44433	0.43361	0.42353	0.4166	0.40844	0.39817	0.38925	0.38347	0.37549	0.37427	0.36788	0.38303	0.36934	0.40006	0.35872	0.36715	0.3302	0.33355	0.33166	0.42383	0.41221	0.45671	0.40233	0.37266	0.38362	0.43522	0.43845	0.48931	0.53021	0.45907	0.42946	0.50985
0.79	0.99692	0.95001	0.87843	0.81147	0.75453	0.70681	0.66645	0.63198	0.60219	0.57603	0.55313	0.53246	0.51413	0.49743	0.48238	0.46857	0.45614	0.44446	0.43393	0.4237	0.41775	0.40708	0.3966	0.39541	0.38137	0.37448	0.37336	0.37259	0.35567	0.36415	0.35384	0.34926	0.39364	0.33476	0.36349	0.38756	0.35768	0.34248	0.38326	0.40011	0.3801	0.30186	0.41728	0.50706	0.47445	0.39808	0.32323	0.44891	0.46796
0.8	0.99692	0.95001	0.87835	0.81146	0.75451	0.70681	0.66642	0.63208	0.60218	0.5763	0.55305	0.53304	0.51409	0.49764	0.48229	0.46984	0.45604	0.4446	0.43306	0.42329	0.41536	0.40547	0.39901	0.38868	0.38275	0.38113	0.36854	0.37117	0.37507	0.3599	0.34714	0.36381	0.34332	0.35305	0.37125	0.37968	0.35539	0.37568	0.37551	0.37434	0.39994	0.36515	0.44473	0.39362	0.35539	0.46481	0.48222	0.43555	0.36432
0.81	0.99692	0.95	0.87837	0.81148	0.7545	0.70677	0.66644	0.63197	0.60242	0.57617	0.55297	0.5326	0.51434	0.49796	0.48252	0.4684	0.45591	0.44499	0.433	0.42281	0.41514	0.40456	0.39637	0.39368	0.38107	0.37818	0.37004	0.36127	0.35548	0.34951	0.34564	0.34171	0.33799	0.37785	0.35609	0.32671	0.38478	0.41643	0.43363	0.42211	0.4634	0.45879	0.35728	0.4496	0.36764	0.42235	0.38461	0.47146	0.4681
0.82	0.99692	0.95001	0.87837	0.81143	0.7545	0.70676	0.6664	0.63204	0.60209	0.5761	0.55319	0.53242	0.51432	0.49749	0.48236	0.46835	0.45628	0.44512	0.43348	0.42514	0.4144	0.40944	0.39715	0.3943	0.38087	0.37393	0.37142	0.36438	0.35686	0.35526	0.39969	0.35115	0.35703	0.33898	0.36484	0.34917	0.39066	0.41534	0.3912	0.39217	0.37414	0.32987	0.43948	0.40892	0.3064	0.47989	0.44902	0.45176	0.51293
0.83	0.99692	0.95003	0.87838	0.81154	0.7545	0.70694	0.66647	0.63192	0.60208	0.57606	0.55309	0.53244	0.51415	0.49753	0.48235	0.46886	0.45558	0.44415	0.43361	0.42303	0.41676	0.40667	0.4018	0.3918	0.38461	0.37427	0.37321	0.36813	0.35592	0.3533	0.35458	0.34873	0.35048	0.33731	0.33647	0.37083	0.3597	0.34821	0.33446	0.37479	0.30586	0.38863	0.40615	0.38601	0.33179	0.42809	0.43924	0.50423	0.32793
0.84	0.99692	0.95002	0.87843	0.81141	0.75456	0.70674	0.66643	0.63194	0.60209	0.57612	0.55295	0.53241	0.5141	0.49739	0.48272	0.46844	0.45592	0.44516	0.43314	0.42419	0.41417	0.40446	0.39734	0.39023	0.38268	0.3779	0.36859	0.36626	0.37043	0.36184	0.35099	0.34419	0.34753	0.38873	0.36035	0.32945	0.36126	0.38333	0.36711	0.41964	0.39776	0.3267	0.38585	0.4177	0.31321	0.45679	0.29446	0.40789	0.44063
0.85	0.99693	0.95	0.87836	0.81141	0.75459	0.70683	0.66642	0.63192	0.60222	0.57602	0.55302	0.53244	0.51401	0.49739	0.48237	0.46841	0.45559	0.44411	0.4348	0.42274	0.41459	0.40491	0.39635	0.39058	0.38222	0.37597	0.36976	0.36878	0.3753	0.35884	0.37413	0.33884	0.33837	0.36574	0.33797	0.35856	0.34153	0.35864	0.36269	0.4307	0.37593	0.347	0.35185	0.35425	0.37639	0.3665	0.4978	0.46417	0.3803
0.86	0.99692	0.95001	0.87837	0.81146	0.75455	0.70679	0.66642	0.63208	0.60213	0.57611	0.55297	0.53249	0.51402	0.49754	0.4822	0.46849	0.45605	0.44393	0.43355	0.42362	0.41497	0.40656	0.39786	0.38942	0.38354	0.37882	0.36786	0.36327	0.36133	0.34961	0.3488	0.34976	0.36113	0.33239	0.32857	0.33179	0.34004	0.33831	0.42221	0.37173	0.3963	0.37438	0.43868	0.47721	0.29751	0.38462	0.41721	0.4369	0.44392
0.87	0.99692	0.95002	0.87842	0.81144	0.75451	0.70675	0.66639	0.63224	0.6023	0.5765	0.55298	0.53259	0.51415	0.49732	0.48254	0.46868	0.45586	0.44504	0.43323	0.42351	0.41395	0.40466	0.39747	0.38946	0.38385	0.37573	0.377	0.36393	0.35943	0.35582	0.35047	0.3391	0.34962	0.34875	0.34529	0.33467	0.33877	0.31897	0.33105	0.31355	0.37571	0.39903	0.36916	0.41162	0.40055	0.41562	0.40787	0.31388	0.37566
0.88	0.99692	0.95007	0.87834	0.8114	0.75464	0.70675	0.66646	0.63193	0.60242	0.57599	0.55294	0.53271	0.51445	0.49772	0.48233	0.46834	0.45554	0.4439	0.43321	0.42345	0.41326	0.40488	0.39628	0.39017	0.38186	0.37857	0.36827	0.3624	0.35548	0.35227	0.35099	0.3393	0.36261	0.35832	0.34523	0.34188	0.32757	0.34192	0.31882	0.34569	0.43871	0.38321	0.44582	0.32096	0.35197	0.34205	0.39498	0.36989	0.39631
0.89	0.99693	0.95	0.87836	0.81141	0.75452	0.70682	0.66646	0.63198	0.60216	0.57611	0.55309	0.53244	0.51424	0.49782	0.48253	0.46913	0.45574	0.44396	0.4341	0.42339	0.41401	0.40591	0.39896	0.39282	0.3831	0.38258	0.37036	0.3659	0.36757	0.35509	0.35191	0.34543	0.34264	0.33049	0.35811	0.34759	0.32607	0.37321	0.31006	0.30945	0.34392	0.31478	0.29734	0.35881	0.36561	0.39665	0.35639	0.41518	0.34332
0.9	0.99693	0.95001	0.87835	0.8115	0.75451	0.70674	0.66639	0.63191	0.60208	0.57641	0.55297	0.53248	0.51427	0.49772	0.48254	0.46841	0.45583	0.44421	0.43341	0.42279	0.41418	0.40467	0.3961	0.39029	0.38273	0.37715	0.3765	0.36967	0.36369	0.36823	0.35369	0.34753	0.35765	0.33655	0.32729	0.33913	0.31657	0.36493	0.31047	0.35471	0.31894	0.34115	0.36183	0.41092	0.4356	0.41171	0.39052	0.31292	0.48903
0.91	0.99693	0.95001	0.87838	0.81143	0.75454	0.70675	0.66638	0.63191	0.60211	0.57639	0.55295	0.53244	0.51425	0.49742	0.48233	0.46848	0.4556	0.44443	0.43311	0.42445	0.4137	0.40461	0.39727	0.38891	0.38143	0.37743	0.36988	0.3685	0.35789	0.34982	0.34961	0.35506	0.34106	0.33775	0.36464	0.33363	0.31921	0.36814	0.32032	0.35035	0.3036	0.36488	0.39413	0.31894	0.35051	0.39391	0.3205	0.37685	0.28032
0.92	0.99692	0.95003	0.87834	0.81153	0.75451	0.70678	0.66641	0.6319	0.60218	0.57607	0.55309	0.53266	0.51415	0.49734	0.48234	0.46846	0.45617	0.44491	0.43313	0.42342	0.41418	0.40484	0.39684	0.38902	0.38448	0.37455	0.37029	0.36686	0.35741	0.35128	0.34431	0.34014	0.35312	0.34277	0.32621	0.33564	0.31976	0.3247	0.35132	0.35502	0.36372	0.35867	0.3297	0.35704	0.31695	0.4015	0.30599	0.39783	0.40122
0.93	0.99692	0.95	0.87838	0.81141	0.75454	0.70718	0.6664	0.63192	0.60215	0.576	0.55298	0.53252	0.51426	0.49733	0.48222	0.46833	0.45586	0.44446	0.4332	0.42326	0.41393	0.40467	0.39822	0.38858	0.38196	0.3802	0.36744	0.36215	0.35597	0.35571	0.34632	0.33908	0.33818	0.33267	0.34063	0.32729	0.34237	0.32472	0.34159	0.34301	0.31598	0.3424	0.33781	0.36996	0.31221	0.29596	0.31518	0.37118	0.39226
0.94	0.99692	0.95001	0.87839	0.8114	0.75451	0.70676	0.66639	0.63197	0.60229	0.576	0.55295	0.53247	0.51403	0.49758	0.48224	0.46848	0.45576	0.44409	0.43312	0.42334	0.41326	0.40625	0.3964	0.39013	0.38097	0.37507	0.3673	0.36275	0.35544	0.35336	0.34723	0.35186	0.34277	0.3352	0.32765	0.32156	0.32351	0.3206	0.32535	0.30517	0.31448	0.30317	0.35721	0.40078	0.35348	0.43445	0.34709	0.33328	0.33646
0.95	0.99692	0.95	0.8784	0.81145	0.75458	0.70677	0.66641	0.63192	0.60209	0.57614	0.55295	0.53244	0.51418	0.49735	0.48246	0.46845	0.45644	0.44401	0.43339	0.42291	0.41332	0.40725	0.39622	0.38858	0.38379	0.375	0.3674	0.36232	0.35539	0.35088	0.34504	0.3623	0.34956	0.34508	0.32559	0.33726	0.31659	0.36642	0.33322	0.32554	0.33609	0.36703	0.31775	0.33719	0.34003	0.39592	0.34106	0.44291	0.34323
0.96	0.99692	0.95004	0.87834	0.81145	0.75454	0.70682	0.66647	0.63193	0.60211	0.57603	0.55302	0.53263	0.51418	0.49758	0.48226	0.46838	0.45568	0.44404	0.43296	0.42278	0.41328	0.40502	0.39685	0.38914	0.38352	0.37725	0.3677	0.36416	0.35746	0.35385	0.34897	0.34762	0.33532	0.32961	0.3498	0.33656	0.33899	0.33838	0.31614	0.38188	0.35186	0.31397	0.29606	0.3253	0.41419	0.29588	0.3095	0.39388	0.31551
0.97	0.99692	0.95004	0.87839	0.81144	0.75451	0.70674	0.6665	0.63193	0.60209	0.57606	0.55295	0.53258	0.51414	0.49747	0.48263	0.46835	0.45571	0.44415	0.43321	0.42329	0.41377	0.40441	0.3966	0.38833	0.38239	0.37507	0.37397	0.36158	0.3599	0.3504	0.34537	0.3391	0.33714	0.33708	0.32795	0.34473	0.325	0.32566	0.32814	0.37555	0.31958	0.30052	0.33907	0.30318	0.39209	0.39896	0.28286	0.3334	0.37887
0.98	0.99692	0.95003	0.87835	0.81145	0.75457	0.70674	0.66639	0.63203	0.60215	0.57602	0.55295	0.53248	0.51406	0.49737	0.48216	0.469	0.4558	0.44381	0.43302	0.423	0.41442	0.40444	0.39802	0.38834	0.38203	0.37782	0.37057	0.36318	0.35548	0.35142	0.35597	0.34296	0.33584	0.33533	0.32582	0.33342	0.32078	0.31667	0.33961	0.30734	0.31622	0.35901	0.31533	0.31972	0.30996	0.30918	0.29019	0.31578	0.41399
0.99	0.99692	0.95003	0.87837	0.81141	0.75456	0.70679	0.6664	0.63197	0.60219	0.57616	0.55298	0.53246	0.51402	0.49735	0.48216	0.46856	0.45604	0.44416	0.43354	0.42287	0.41357	0.40475	0.39818	0.38956	0.38089	0.37519	0.37012	0.36113	0.35613	0.3509	0.34776	0.33929	0.3344	0.33804	0.32493	0.32513	0.31819	0.32931	0.35902	0.30443	0.31187	0.30295	0.316	0.29217	0.30764	0.32249	0.32214	0.34108	0.39304
1	0.99693	0.95002	0.87836	0.81141	0.75463	0.70675	0.66653	0.63199	0.60208	0.57599	0.55297	0.53254	0.51409	0.49745	0.48292	0.46838	0.45555	0.44381	0.4333	0.42276	0.41389	0.40455	0.39628	0.38894	0.38304	0.37593	0.37186	0.36349	0.35509	0.35333	0.34835	0.33888	0.33429	0.33152	0.34424	0.32552	0.33351	0.31943	0.31104	0.30541	0.30488	0.30531	0.30953	0.30467	0.35957	0.33171	0.36873	0.27968	0.2787
[truncated: 149 more columns]
